# Supplementary material
Source: PubMed Central journal article supplement (PMC5240020)
Supplement: leu201680x1.pdf [file leu201680x1.pdf]

## Supplementary Text

### Whole exome sequencing

Matched diagnostic and remission DNA was available for eight iAMP21 patient samples. Exomes were captured using 3-5ug of DNA per sample and the Sureselect Human All Exon 50Mb V2 (patient 1) or V4 Kit (patients 3, 5, 7, 9, 21, 43 and 44), as recommended (Agilent Technologies, Santa Clara, USA). Each library was prepared for sequencing using the Paired-End Library Preparation Kit (Illumina, San Diego, California, USA). The diagnostic and remission exomes of patient 1 were each sequenced on two lanes of one flowcell on the Illumina Genome Analyzer IIX (GAIIIX) using 75bp paired-end chemistry (Newcastle University, Newcastle upon Tyne, UK). The libraries of the remaining samples were sequenced on the Illumina HiSeq 2000 using 100bp paired-end chemistry (AROS Applied Biotechnology AS, Aarhus, Denmark). Average coverage was 60-fold (range, 28-fold to 100-fold) per patient sample, calculated using DepthOfCoverage (Genome Analysis Toolkit (GATK), Broad Institute).

Paired end reads of the diagnostic and remission sample were aligned to UCSC hg19 with appropriate read groups set using BWA MEM algorithm of Burrows-Wheeler Aligner (version 0.7.10-r789).<sup>1</sup> The resultant SAM alignments were then converted to co-ordinate sorted and indexed BAM files and de-duplicated using Picard tools (version 1.137) (<http://picard.sourceforge.net/>). Standard GATK sample preparation was used to perform indel realignment and base quality score recalibration on the BAM files (GATK version 3.4).<sup>2</sup> <sup>3</sup> Haplotype Caller (HC) (GATK) was used to call variants in the BAM file of each sample according to the current GATK 3.4 JointGenotyping gVCF workflow. Individual de-duplicated and indel realigned matched diagnostic/remission BAM files were then merged into one BAM file which underwent a second round of indel realignment, followed by base quality score recalibration (using GATK 3.4), before undergoing joint tumour/normal variant calling using MuTect to identify diagnostic variants.<sup>4</sup>

Diagnostic-specific variants were annotated using Variant Effect Predictor (VEP).<sup>5</sup> Variants within coding exons or splice site regions were selected for further analysis. The functional effect of individual mutations was assessed using PolyPhen2 and SIFT, for which the scores were derived by VEP, and/or Mutation Taster.<sup>6-8</sup> COSMIC (Catalogue of Somatic Mutations in Cancer (COSMIC), version 66) and DBSNP (version 137) were used to characterise the variants which was outputted from VEP.<sup>9, 10</sup> Supplementary Table 4 contains a list of somatic mutations that were predicted to damage the function of the protein by the majority of prediction tools, when available for analysis (indels and splice site variations could often not be assessed using PolyPhen2 or SIFT). DBSNP variants with <1% minor allelic frequency (MAF) were included.

### **Code availability**

The pipeline and associated scripts are available online through GitHub (<https://github.com/MattBashton/MB-GATK-SGE>).

### **Validation of putative mutations**

53% (106/199) of candidate somatic mutations were validated using targeted sequencing approaches or Sanger sequencing (Supplementary Table 4).

Sanger sequencing validations were performed using WGA DNA of the diagnostic and remission sample. PCR products were generated using specific primers (Supplementary Table 3) and standard PCR conditions (AmpliTaq Gold® DNA polymerase, Applied Biosystems, Paisley, UK). Samples with a visible band by gel electrophoresis were purified using the QIAquick PCR Purification kit (Qiagen, Manchester, UK) and sent for Sanger sequencing (DBS Genomics, Durham University, Durham, UK). Sequencing traces were interpreted using FinchTV (Geospiza, Inc, Seattle, USA) and alignment was performed using BLAT (UCSC) and BLAST (NCBI).<sup>11-13</sup>

Targeted sequencing was performed using Haloplex Target Enrichment technology (Agilent Technologies). The assay was designed to capture regions surrounding the putative mutation using SureDesign (Agilent Technologies). Libraries were prepared using WGA DNA of the diagnostic and remission material from the eight iAMP21 patient samples, as recommended (Agilent Technologies). 16 samples were pooled together at equimolar concentrations and sequenced on the Illumina HiSeq 2000 using 100bp paired-end chemistry (Edinburgh Genomics, University of Edinburgh, UK). Data analysis and variant annotation was performed using the protocol that was established to analyse the whole exome sequencing libraries (read alignment using BWA, mutation calling following the GATK Best Practices workflow (HC, MuTect) and VEP to annotate the variants).

100% (106/106) of the putative mutations were validated and demonstrated to be somatic (i.e. no mutant reads were detected in the remission sample). None of the putative mutations that were selected for validation were undetected by the assay.

## References

- 1 Li H, Durbin R. Fast and accurate long-read alignment with Burrows-Wheeler transform. *Bioinformatics*. 2010 Mar 1;26(5):589-95.
- 2 DePristo MA, Banks E, Poplin R, Garimella KV, Maguire JR, Hartl C, et al. A framework for variation discovery and genotyping using next-generation DNA sequencing data. *Nature genetics*. 2011 May;43(5):491-8.
- 3 Van der Auwera GA, Carneiro MO, Hartl C, Poplin R, Del Angel G, Levy-Moonshine A, et al. From FastQ data to high confidence variant calls: the Genome Analysis Toolkit best practices pipeline. *Current protocols in bioinformatics / editorial board, Andreas D Baxevanis [et al]*. 2013 Oct 15;11(1110):11 0 1- 0 33.
- 4 Cibulskis K, Lawrence MS, Carter SL, Sivachenko A, Jaffe D, Sougnez C, et al. Sensitive detection of somatic point mutations in impure and heterogeneous cancer samples. *Nature biotechnology*. 2013 Mar;31(3):213-9.
- 5 McLaren W, Pritchard B, Rios D, Chen Y, Flicek P, Cunningham F. Deriving the consequences of genomic variants with the Ensembl API and SNP Effect Predictor. *Bioinformatics*. 2010 Aug 15;26(16):2069-70.
- 6 Kumar P, Henikoff S, Ng PC. Predicting the effects of coding non-synonymous variants on protein function using the SIFT algorithm. *Nature protocols*. 2009;4(7):1073-81.
- 7 Adzhubei IA, Schmidt S, Peshkin L, Ramensky VE, Gerasimova A, Bork P, et al. A method and server for predicting damaging missense mutations. *Nature methods*. 2010 Apr;7(4):248-9.
- 8 Schwarz JM, Cooper DN, Schuelke M, Seelow D. MutationTaster2: mutation prediction for the deep-sequencing age. *Nature methods*. 2014 Apr;11(4):361-2.

- 9 Forbes SA, Beare D, Gunasekaran P, Leung K, Bindal N, Boutselakis H, et al. COSMIC: exploring the world's knowledge of somatic mutations in human cancer. *Nucleic acids research*. 2015 Jan;43(Database issue):D805-11.
- 10 Sherry ST, Ward MH, Kholodov M, Baker J, Phan L, Smigielski EM, et al. dbSNP: the NCBI database of genetic variation. *Nucleic acids research*. 2001 Jan 1;29(1):308-11.
- 11 Camacho C, Coulouris G, Avagyan V, Ma N, Papadopoulos J, Bealer K, et al. BLAST+: architecture and applications. *BMC bioinformatics*. 2009;10:421.
- 12 Kent WJ. BLAT--the BLAST-like alignment tool. *Genome research*. 2002 Apr;12(4):656-64.
- 13 Altschul SF, Gish W, Miller W, Myers EW, Lipman DJ. Basic local alignment search tool. *Journal of molecular biology*. 1990 Oct 5;215(3):403-10.

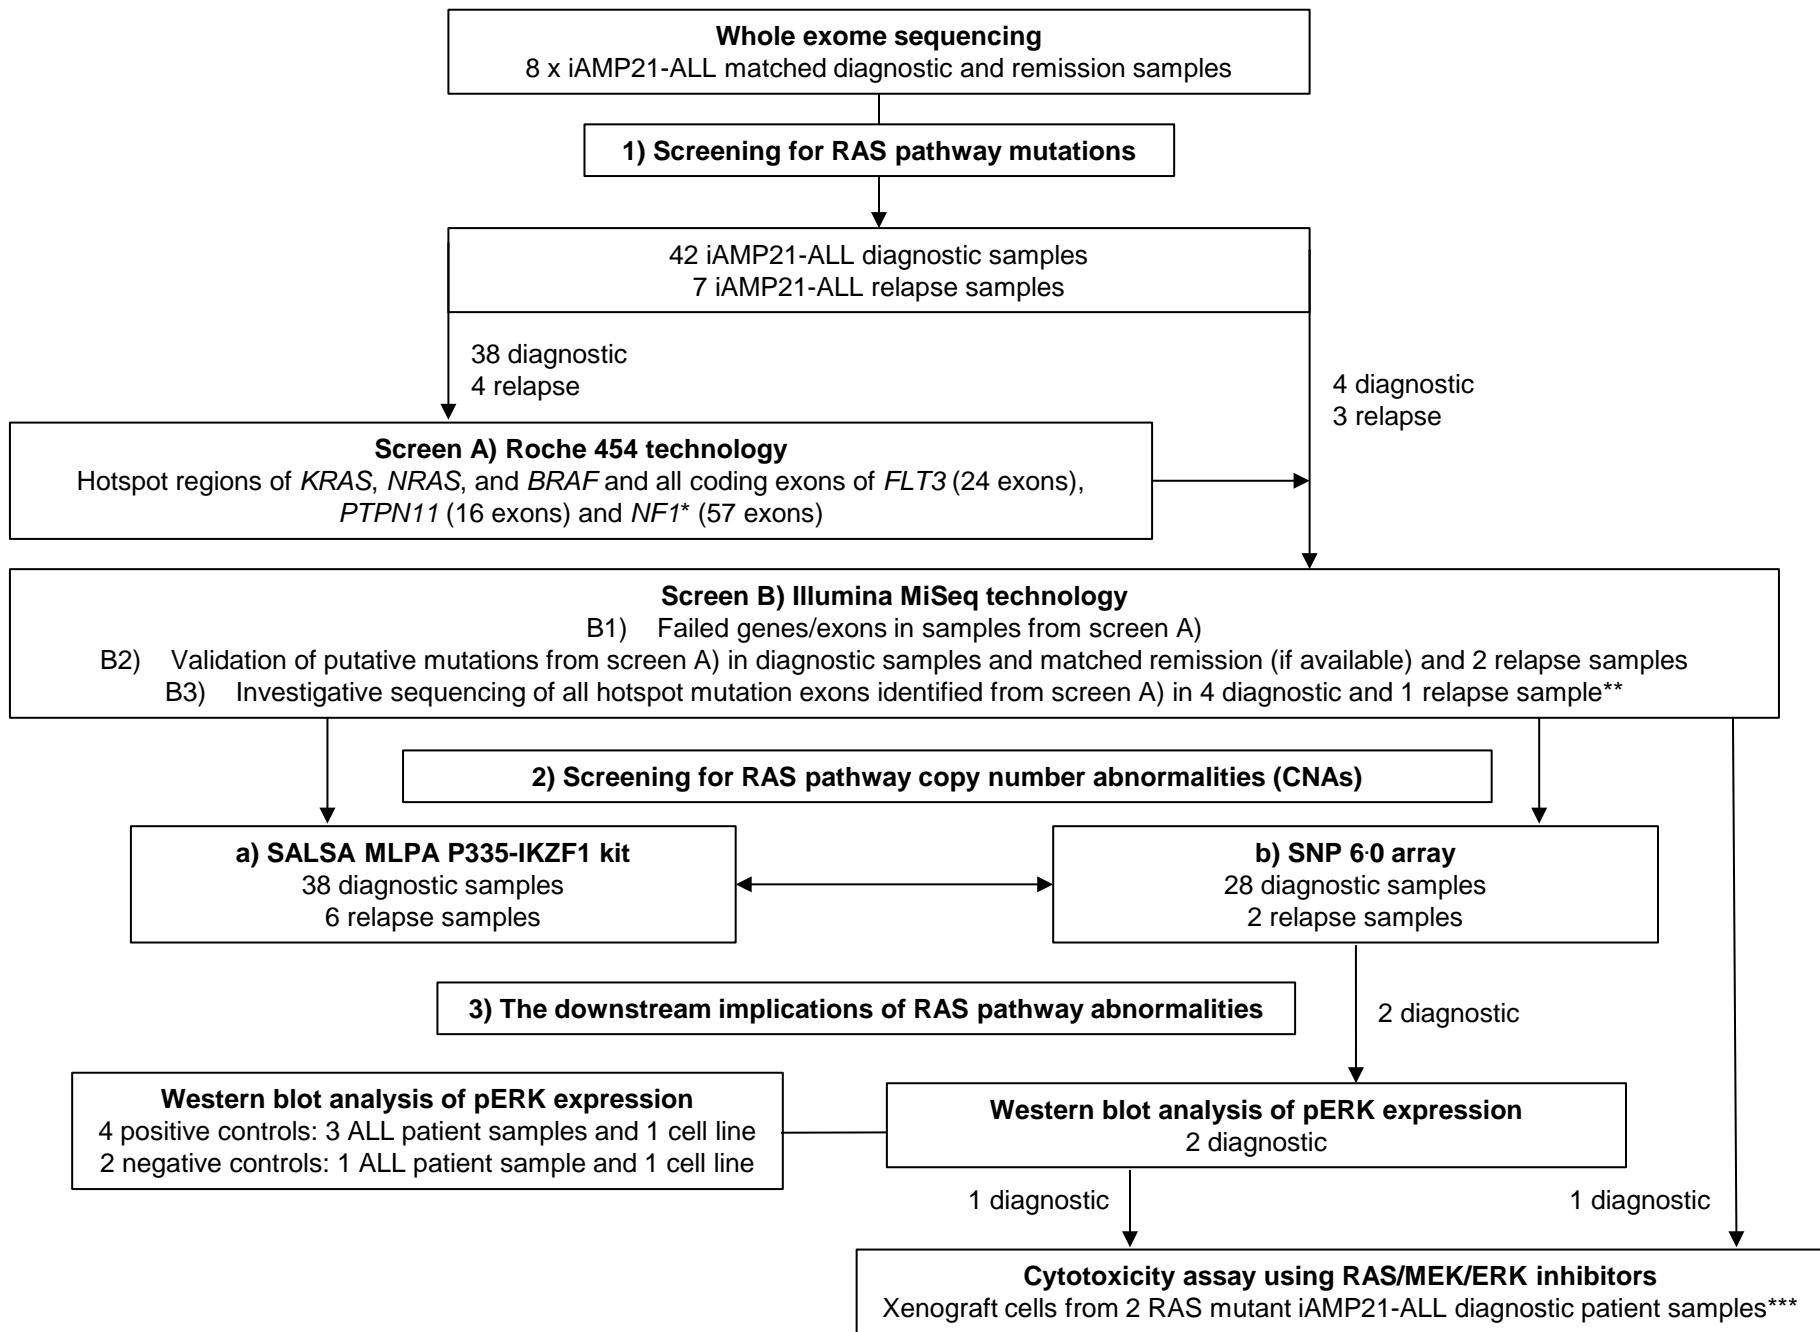

**Supplementary Figure 1: RAS pathway investigations in iAMP21-ALL.** Whole exome sequencing was carried out on 8 matched diagnostic and remission samples, in which RAS pathway mutations were identified at an incidence of 75% (6/8).

(1) iAMP21-ALL samples (n=49, 42 diagnostic and 7 relapse) were subsequently screened for RAS pathway abnormalities. Two mutation screens were carried out: (A) screen A was performed using genomic DNA from 38 diagnostic and 4 relapse samples to investigate the mutational hotspot regions of *KRAS* (exons 2 and 3), *NRAS* (exons 2 and 3), and *BRAF* (exons 11 and 15) and all coding exons of *PTPN11*, *FLT3*, and *NF1* using Roche 454 sequencing technology. \*Apart from patient 1, no other *NF1* mutations were identified in an additional 20 samples, thus no further cases were screened. Individual exons were amplified using a 4-primer PCR method; custom-made primers and Access Array Barcode Library primers (Fluidigm Technologies, San Francisco, California, USA) were used to generate individual PCR products using the Access Array System (Fluidigm Technologies) or ABI 2700 Thermocycler (Applied Biosystems, Foster City, California, USA). Amplicons were assessed on the Agilent Bioanalyser (DNA 1000 Assay, Agilent Technologies, Santa Clara, USA) and PCR products were pooled at equimolar concentrations. Data analysis was performed using version 3.4.0 SeqNext (JSI Medical Systems, Kippenheim, Germany) and mutations were identified by manual assessment. The average read coverage achieved for screen A was 418 reads (349-577 per gene). Putative mutations were selected for validation (screen B) if: i) present at a similar variant allele frequency (VAF) (% of mutated reads) and in  $\geq 10$  reads in both sequencing directions (forward and reverse) or ii) previously reported in COSMIC (<http://cancer.sanger.ac.uk/cancergenome/projects/cosmic/>) and iii) not in a region of homopolymer sequence. (B) Screen B was performed using whole genome amplified (WGA) DNA and employed Illumina MiSeq sequencing technology to: (B1) repeat any exons or genes that failed to sequence in screen A, (B2) validate the putative mutations identified in patient samples from screen A and (B3) identify mutations in the hotspot regions of *NRAS* (exons 2 and 3), *KRAS* (exons 2 and 3), *BRAF* (exons 11 and 15), *FLT3* (exons 5, 14, 15 and 20), and *PTPN11* (exons 3, 9, and 13) in an additional 4 diagnostic and 1 relapse iAMP21-ALL patient sample. Matched remission (n=9) and/or relapse (n=3) material was sequenced if sufficient material was available to confirm the somatic or diagnostic-specific nature of the mutations identified in Screen A. The average read coverage achieved for screen B was 35,280 (30,250-48,550 per gene). Mutations were confirmed/validated in screen B if present in  $\geq 500$  reads and at a similar VAF (%) to screen A. WGA DNA was representative of the original patient material, the VAF (%) and pattern of RAS mutations was similar for both sample derivatives. \*\* Genomic DNA of B-other (n=66) and high hyperdiploid (n=48) patient samples were screened for mutations in the hotspot regions of *NRAS* (exons 2 and 3), *KRAS* (exons 2 and 3) and *FLT3* (exons 4, 14, 15 and 20) using the same targeted sequencing approach. These genes/exons were selected due to their high mutation rate in iAMP21-ALL, to enable a comparison of mutational profiles between the three cytogenetic subgroups. Mutations were identified in the B-other and hyperdiploid patient samples if present in  $\geq 50$  reads and at a similar VAF (%) in both sequencing directions (forward and reverse).

(2) Copy number profiling was performed to assess the association between copy number abnormalities (CNAs) and mutations in the RAS pathway genes using (a) SALSA MLPA P335-IKZF1 kit on 38 diagnostic and 6 relapse iAMP21-ALL samples and (b) SNP6-0 analysis in 28 diagnostic and 2 relapse cases.

(3) The downstream functional effect of RAS pathway mutations was assessed in two patient samples and 4 positive controls (patient samples and cell lines) by western blot analysis of pERK expression. The cytotoxic effect of selumetinib (MEK1/2 pathway inhibitor) was tested using viable cells from the xenografts of primary cells from two iAMP21-ALL samples with RAS pathway mutations and positive pERK expression. \*\*\* Two iAMP21-ALL samples (patients 45 and 46b), in which the xenograft material was screened for RAS mutations, were used as controls in the cytotoxicity assay (Supplementary Figure 6). The results of these studies are reported in the manuscript.

A

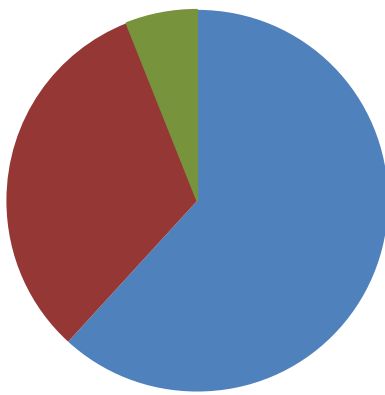

■ Transition  
■ Transversion  
■ Indel

B

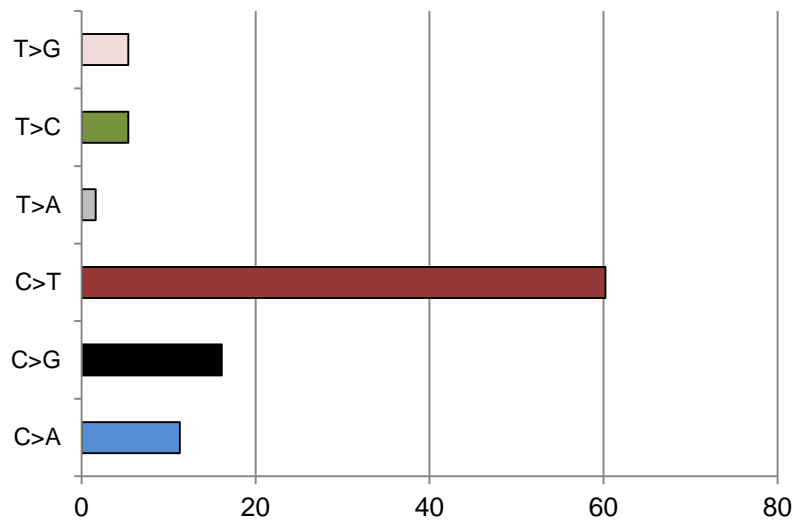

C

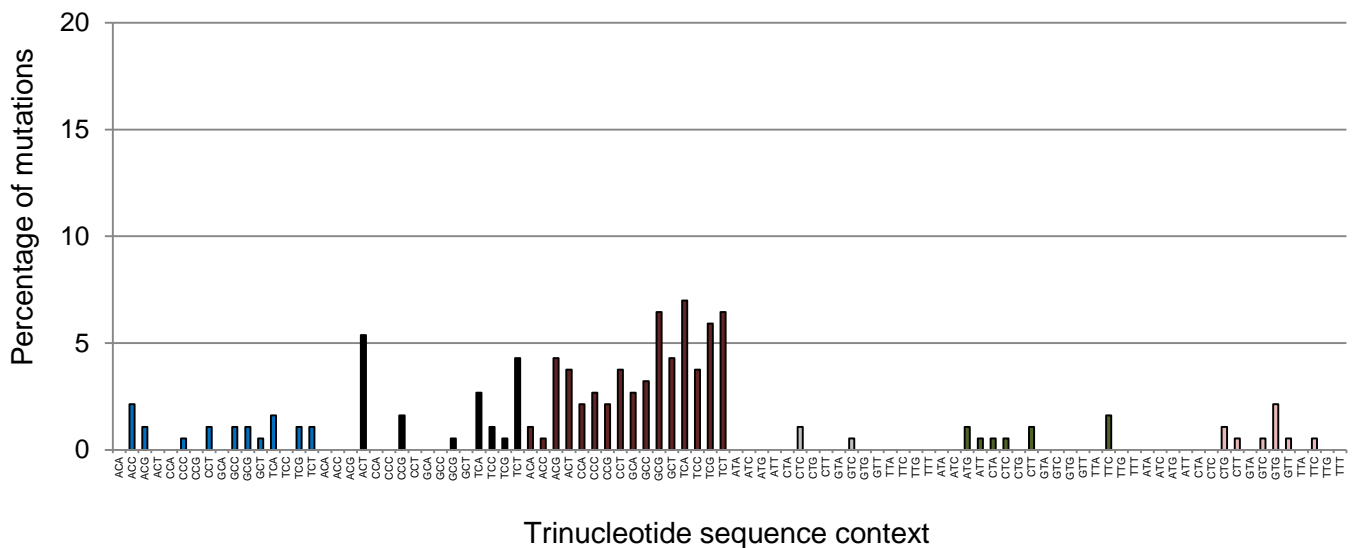

**Supplementary Figure 2: The mutational landscape of iAMP21-ALL.** The exome of 8 iAMP21-ALL patient samples harboured 186 nucleotide substitutions and 13 insertions or deletions (indels). (A) Transitions were more common than transversions (0.62:0.32) or indels (0.62: 0.06). (B) Mutations were predominantly composed of C:G>T:A substitutions (60%) with C:G>G:C and C:G>A:T mutations representing a smaller proportion (27%) of substitutions. (C) Most C>T substitutions tended to arise at CpG or TpC sites, a mutational signature that has previously been described in ALL and is associated with DNA methylation, an established process in genome evolution and cancer.<sup>1,2</sup>

1 Alexandrov LB, Nik-Zainal S, Wedge DC, Aparicio SA, Behjati S, Biankin AV, et al. Signatures of mutational processes in human cancer. *Nature*. 2013 Aug 22;500(7463):415-21.

2 Papaemmanuil E, Rapado I, Li Y, Potter NE, Wedge DC, Tubio J, et al. RAG-mediated recombination is the predominant driver of oncogenic rearrangement in ETV6-RUNX1 acute lymphoblastic leukemia. *Nature genetics*. 2014 Feb;46(2):116-25.

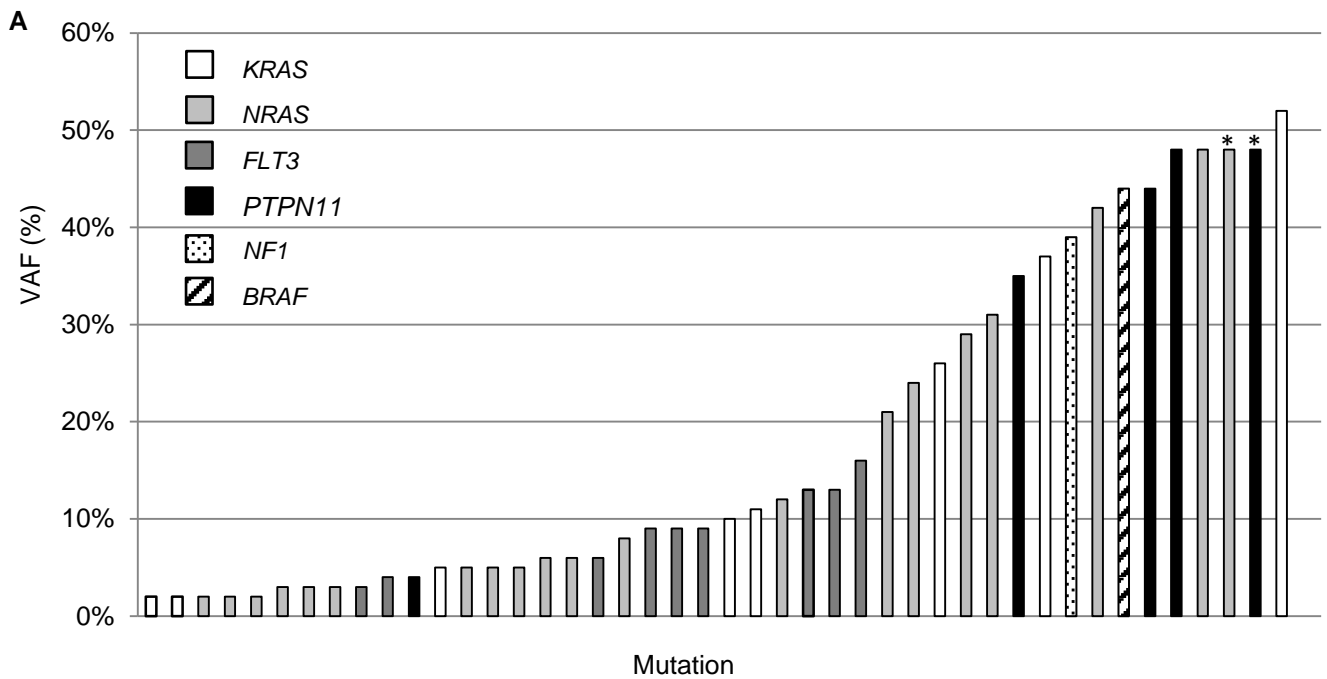

**B**

| i) Gene       | ii) # of mutations | iii) Average VAF (%) | iv) Co-occurring mutation rate (% of gene mutations that co-occurred with other RAS pathway mutations) |
|---------------|--------------------|----------------------|--------------------------------------------------------------------------------------------------------|
| <i>KRAS</i>   | 8                  | 15%                  | 100.0%                                                                                                 |
| <i>NRAS</i>   | 20                 | 18%                  | 69%                                                                                                    |
| <i>FLT3</i>   | 9                  | 9%                   | 22%                                                                                                    |
| <i>PTPN11</i> | 5                  | 35%                  | 75%                                                                                                    |
| <i>NF1</i>    | 1                  | 39%                  | 100%                                                                                                   |
| <i>BRAF</i>   | 1                  | 44%                  | 100%                                                                                                   |

**Supplementary Figure 3: The highly variable nature of RAS pathway mutations in iAMP21-ALL.** 44 mutations were identified in components of the RAS pathway (*KRAS*, *NRAS*, *FLT3*, *PTPN11*, *NF1*, and *BRAF*) in 26 patient samples (25 diagnostic and 1 relapse (marked by \*). Each RAS pathway gene is colour/pattern-coded as depicted in the respective figure. (A) The variant allele frequency (VAF (% of mutated reads / total reads at the base position)) of each RAS pathway mutation (n=44) identified in the iAMP21-ALL samples can be highly variable, ranging from 2-52%. Each bar represents a single mutation (x-axis) and the corresponding VAF is represented on the y-axis. (B) A tabular summary of the (ii) number of mutations reported for each gene, (iii) average VAF (%) of the mutations per gene and iv) proportion of cases that harboured  $\geq 2$  mutations (co-existent mutations) per mutated gene. *PTPN11*, *NF1* and *BRAF* were often mutated at a higher VAF (%) than other RAS pathway genes and *FLT3* mutations were present as single mutations more often than the other RAS pathway genes, however, the significance of these findings could not be assessed due to the small cohort size.



**A**

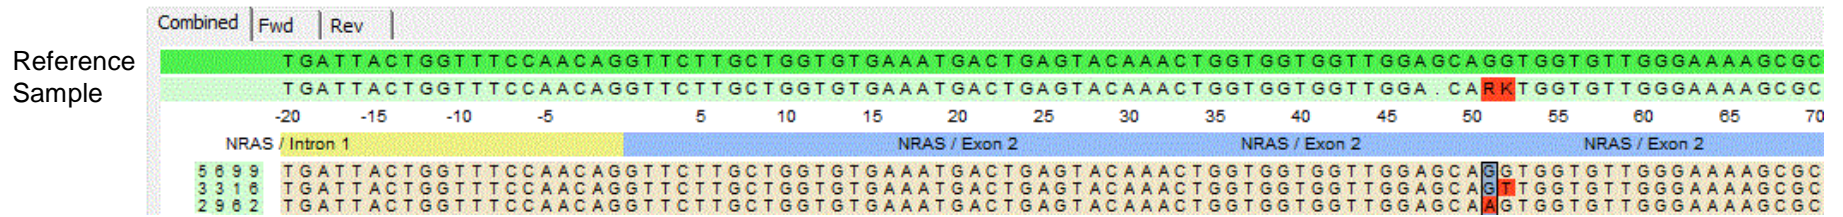

**B**

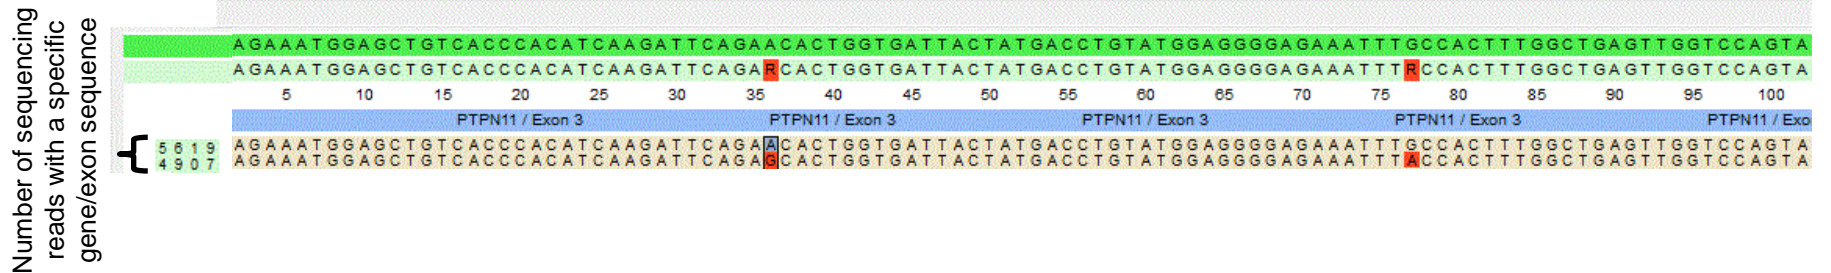

**Supplementary Figure 4: RAS pathway mutations were often present in distinct read populations.** Images were taken from SeqNext software (JSI Medical Systems) to demonstrate the subclonal nature of RAS pathway mutations in iAMP21-ALL patient samples 5 (A) and 19 (B). Reference genomic sequence and patient sample genomic sequence are shown. Mutations are highlighted in red text and the number of sequencing reads with a specific gene/exon sequence are depicted. (A) *NRAS* p.G12S and p.G12V mutations were detected in two individual read populations in patient 19; 2962 reads harboured the G->A substitution at base position 34 and 3316 reads had a G->T nucleotide change at base position 35, resulting in the p.G12S and p.G12V mutations, respectively. These two mutations were therefore present in different read populations and represented individual alleles or subclones, the latter of which would increase the mutational burden of RAS pathway mutations to 45% in this patient sample. Approximately half of the sequencing reads (n=5699) contained the normal sequence for *NRAS* exon 2. Similar findings were reported for 89% (8/9) of iAMP21-ALL samples, in which multiple mutations were identified within the same exon/amplicon. (B) *PTPN11* p.N58S (A->G at base position 173) and p.A72T (G->A at base position 214) were identified in the same read population (4907 reads) in patient 5, demonstrating that both mutations were present within the same allele.

**A**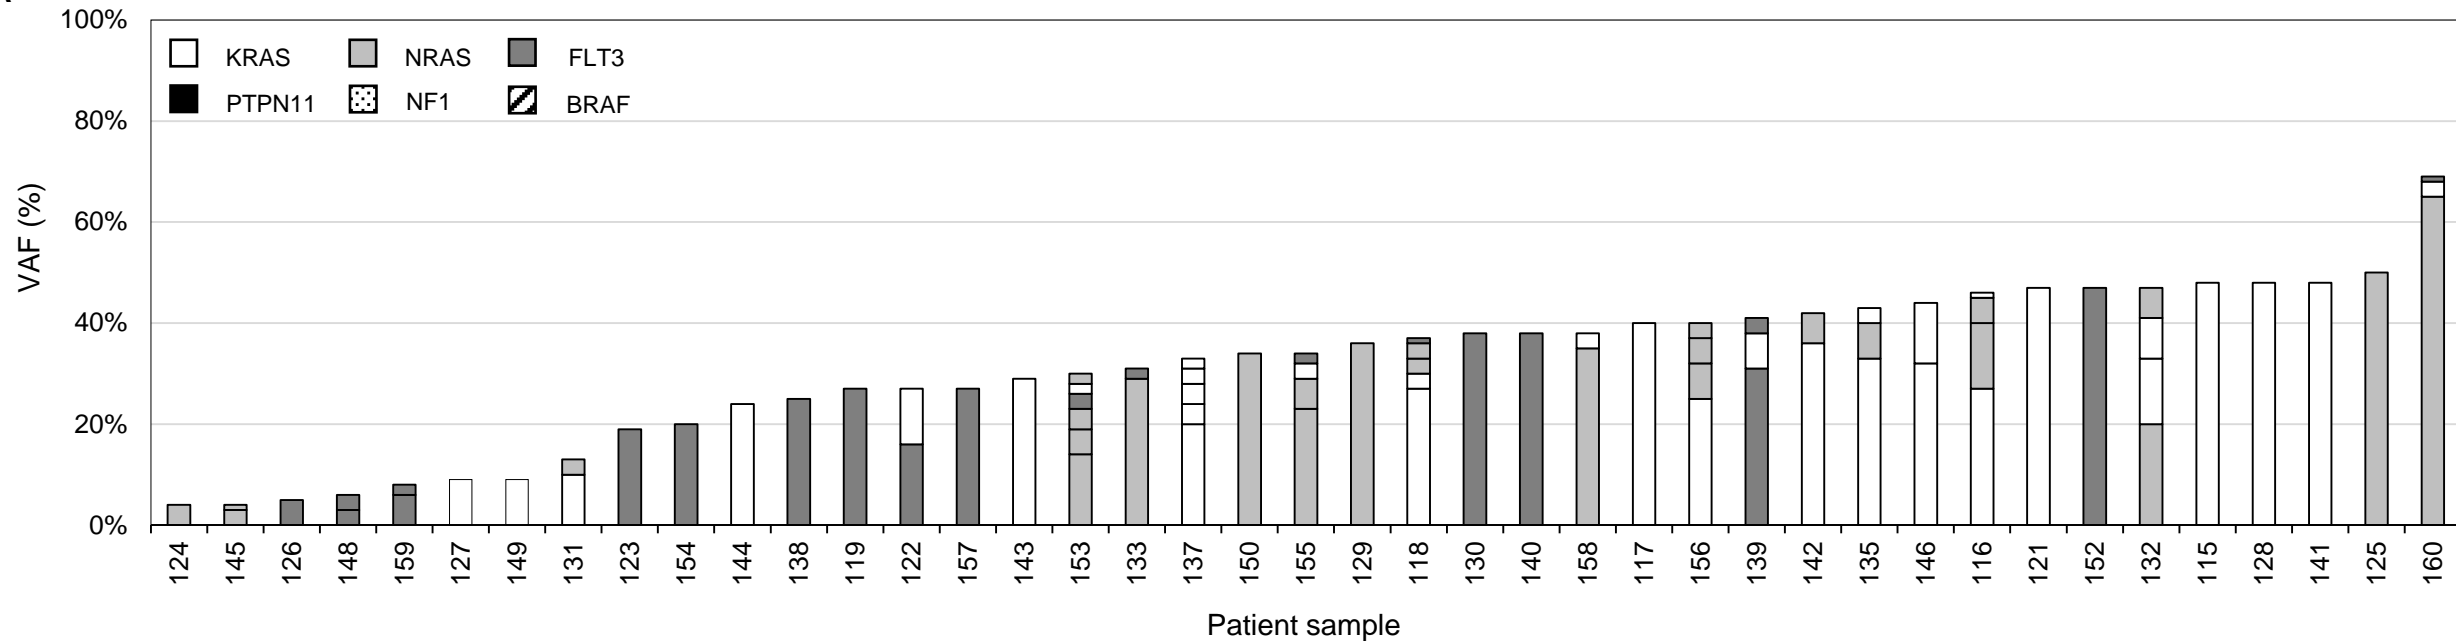**B**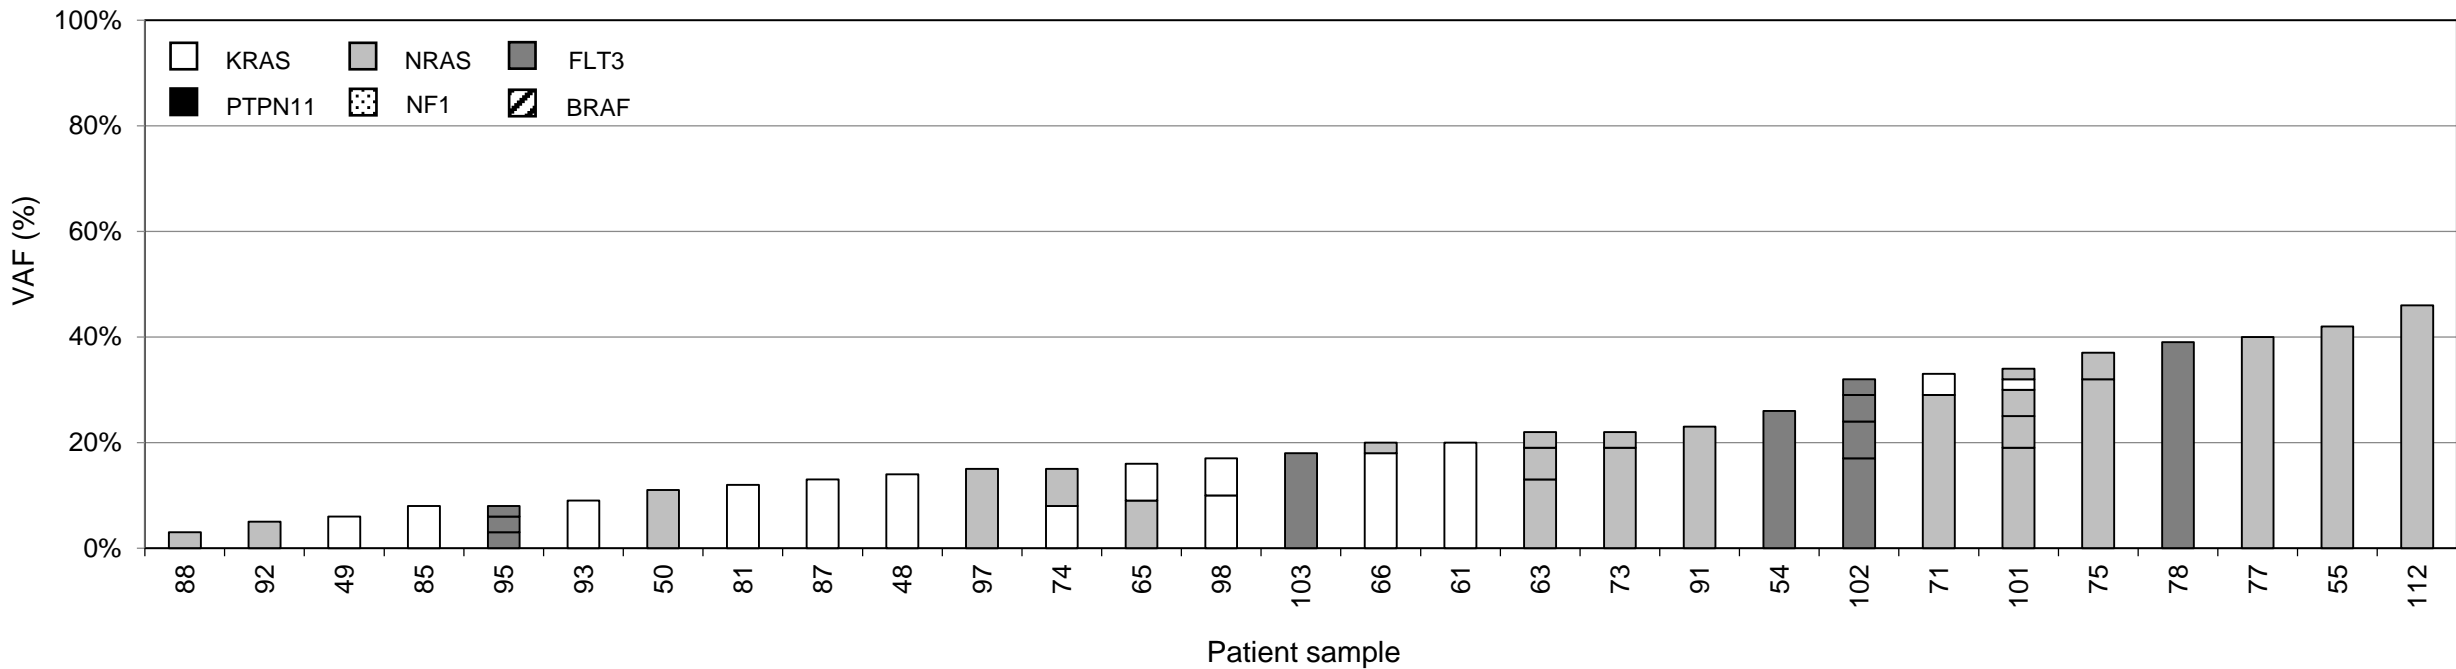

C

| Gene        | Hyperdiploidy  |               |                 |                            | iAMP21         |                |                 |                            | B-other        |               |                 |                            |
|-------------|----------------|---------------|-----------------|----------------------------|----------------|----------------|-----------------|----------------------------|----------------|---------------|-----------------|----------------------------|
|             | # of mutations | Incidence (%) | Average VAF (%) | Co-occurring mutation rate | # of mutations | Incidence (%)* | Average VAF (%) | Co-occurring mutation rate | # of mutations | Incidence (%) | Average VAF (%) | Co-occurring mutation rate |
| <i>KRAS</i> | 34             | 71%           | 18%             | 74%                        | 8              | 19%            | 15%             | 100.0%                     | 14             | 21%           | 10%             | 50%                        |
| <i>NRAS</i> | 27             | 56%           | 15%             | 85%                        | 20             | 48%            | 18%             | 69%                        | 23             | 35%           | 15%             | 65%                        |
| <i>FLT3</i> | 20             | 42%           | 16%             | 55%                        | 9              | 21%            | 9%              | 22%                        | 6              | 9%            | 18%             | 50%                        |

**Supplementary Figure 5: The co-occurring nature of RAS pathway mutations in high hyperdiploid and B-other ALL.** (A, B) *KRAS*, *NRAS* and *FLT3* mutations were investigated in patient samples with high hyperdiploid ALL (n=48) (A) or B-other ALL (n=66) (B). Each sample is labelled on the x-axis and the y-axis defines the variant allele frequency (VAF (%)) of each mutation. The pattern/colour of each bar represents the mutated gene, as depicted by the key. Subclonal mutations of *KRAS*, *NRAS* and *FLT3* were identified in hyperdiploid and B-other ALL. (C) The mutational profile of RAS pathway genes in ALL subgroups. The average VAF (%) and co-existence nature of *KRAS*, *NRAS* and *FLT3* mutations in high hyperdiploid (n=81), iAMP21- (n=37) and B-other ALL (n=43) that represent each gene are shown. Co-occurring mutation rate represents the % of gene mutations that co-occurred with another RAS pathway mutation. The incidence of gene mutations in the diagnostic sample of patients with high hyperdiploid (n=48) iAMP21- (n=42 (\*not including relapse samples) and B-other (n=66) ALL; the co-existence of other RAS gene mutations in the same sample is not represented in this column. *FLT3* mutations tend to arise independently of other RAS pathway gene mutations in iAMP21-ALL (Fisher's exact test, isolated or co-existent *FLT3* mutations in iAMP21 and non-iAMP21-ALL, p=0.14).

A

| Mutation               | Sample ID | Diagnostic VAF(%) | Primary xenograft VAF (%) | Secondary xenograft VAF (%) | Tertiary xenograft VAF (%) |
|------------------------|-----------|-------------------|---------------------------|-----------------------------|----------------------------|
| <i>NF1</i><br>p.P1667S | 1         | 39%               | 45%                       | 48%                         | 44%                        |
| <i>NRAS</i><br>p.Q22K  | 1         | 5%                | 6%                        | 2%                          | 7%                         |
| <i>NRAS</i><br>p.Q61H  | 14        | 31%               | NA                        | 47%                         | 47%                        |

B

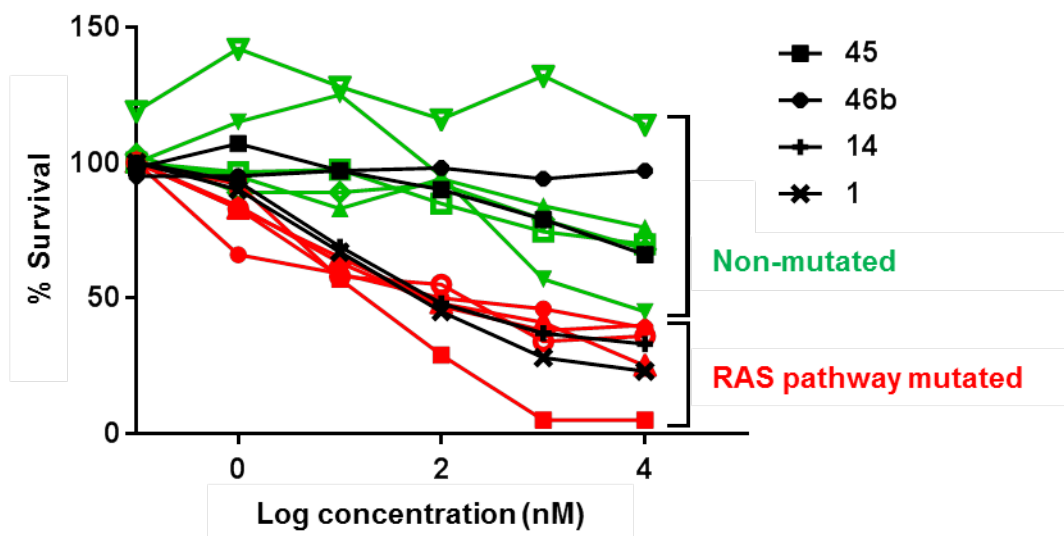

C

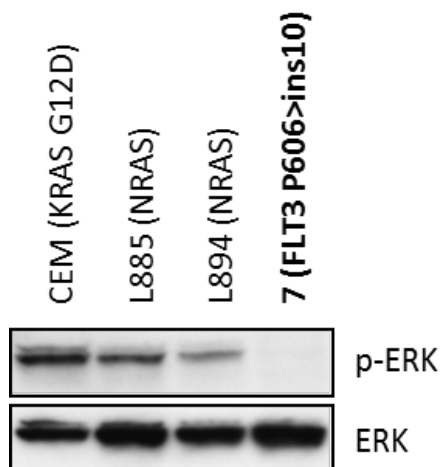

**Supplementary Figure 6: RAS pathway mutations are maintained in 1<sup>o</sup>, 2<sup>o</sup>, and 3<sup>o</sup> xenograft models.** (A) Summary of the sequencing data from the NGS targeted sequencing method. Mutations were assessed as discussed in Methods, Targeted Sequencing Approaches, of the main article. Three RAS pathway mutations were identified in the diagnostic material of patient 1 (n=2) and 14 (n=1). Variant allele frequency (VAF) represents the proportion of combined forward and reverse reads that harbour the mutation at the respective base position. Mutations were confirmed in the 1<sup>o</sup>, 2<sup>o</sup>, and 3<sup>o</sup> xenograft material and at similar variant allele frequencies to the diagnostic sample. *NRAS* (exons 2 and 3), *KRAS* (exons 2 and 3), *FLT3* (exons 14, 15 and 20) and *PTPN11* (exons 3, 9 and 13) mutations were not identified in the xenograft material of patients 45 or 46b. These RAS pathway genes/exons were specifically selected for sequencing as they were recurrently mutated in iAMP21 ALL patient samples. Xenograft cells from these patients were used as a control to assess the sensitivity of unmutated cells to selumetinib. (B) Cytotoxicity assays were performed using the MEK1/2 inhibitor, selumetinib, on viable cells from the xenografts of patients 1, 14, 45 and 46b. Reduced cell viability was observed in response to selumetinib *in vitro* in patient 1 and 14 only, comparable to levels observed in other RAS mutant ALL samples (red) from our previous study.<sup>1</sup> Similarly, the response seen in patients 45 and 46b was equivalent to other non-mutated ALL samples (green). (C) pERK expression was assessed in patient 7 (bold text), relative to three RAS mutant samples. pERK was observed in the positive control samples and absent in patient 7, which harboured *FLT3*-ITD (p.P606\_R607ins10, VAF=4%), demonstrating that this *FLT3* mutation did not activate the RAS/RAF/ERK pathway, or at least not to detectable levels .

## References

1. Irving J, Matheson E, Minto L, Blair H, Case M, Halsey C, et al. Ras pathway mutations are prevalent in relapsed childhood acute lymphoblastic leukemia and confer sensitivity to MEK inhibition. *Blood*. 2014 Nov 27;124(23):3420-30.

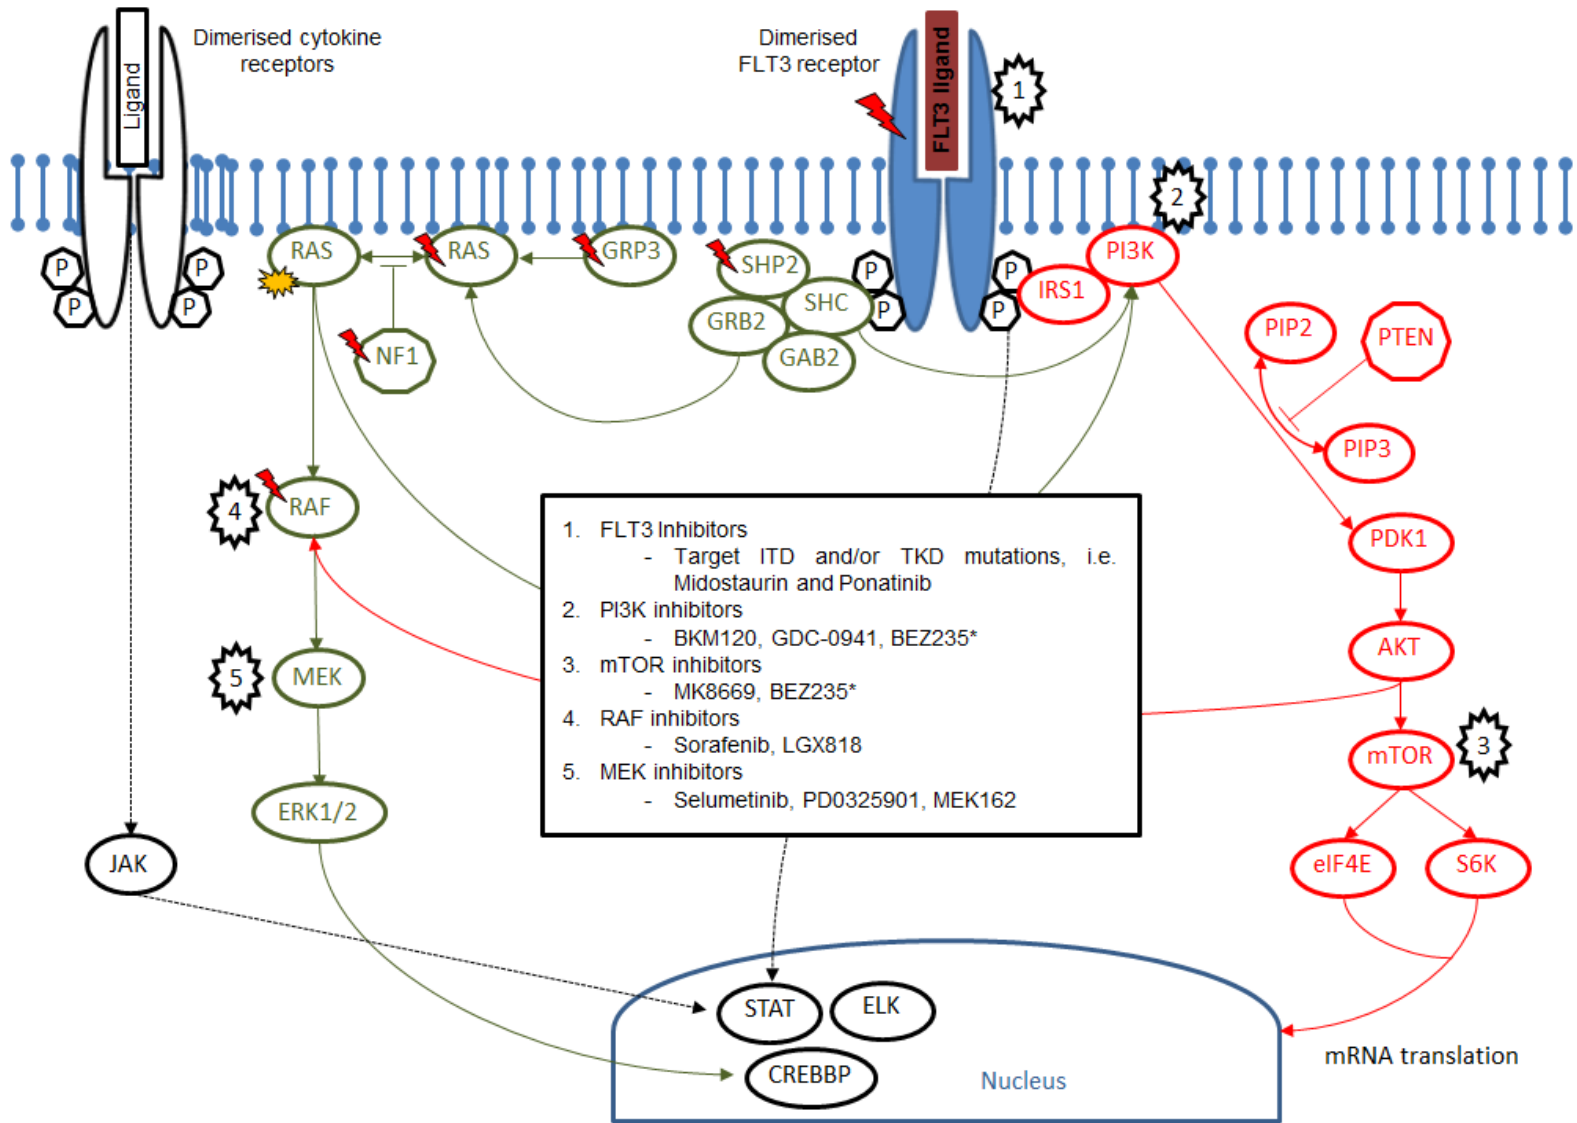

**Supplementary Figure 7: The RAS/RAF/ERK and PI3K/AKT/mTOR pathways – a complex network.** FLT3 receptor (blue) dimerisation and anchorage at the cell membrane encourages FLT3 ligand (dark red) binding, which leads to auto-phosphorylation of the receptor ('P' hexagon symbol), and activation of the RAS/RAF/MEK (green) and PI3K/AKT/mTOR (red) pathways. Mutant FLT3 receptor can directly activate STAT5, usually regulated by the cytokine receptor/JAK/TYK2 pathway.<sup>1</sup> RAS activity is regulated by NF1, and the active state is represented with the yellow explosion symbol. Some genes can co-activate components of both pathways, i.e. RAS can activate RAF and PI3K, and inhibition of one pathway may therefore lead to activation of the other.<sup>2</sup> Furthermore, mechanisms of drug resistance can evolve in a sample treated with one form of inhibitor, though the acquisition of mutations in genes involved in the alternative pathway.<sup>3</sup> The administration of multiple inhibitors that target a number of key cell-signalling pathways, or in combination with chemotherapeutic agents, may overcome the issue of pathway co-activation or drug resistance. Mutations were detected in *FLT3*, *SHP2* (*PTPN11*), *GRP3* (*RASGRP3*), *RAS*, *NF1*, and *BRAF* (highlighted by the red lightning bolt) in our iAMP21-ALL cohort. Several components of the RAS/RAF/MEK and PI3K/AKT/mTOR pathways are the current focus of novel targeted therapeutic development; examples of targetable genes (numbered stars) and developed therapies are shown in the white box (<http://www.mycancergenome.org/content/other/molecular-medicine/anticancer-agents/>). \*Therapeutic agents that exhibit multi-gene inhibition.

#### References:

1. Choudhary C, Brandts C, Schwable J, Tickenbrock L, Sargin B, Ueker A, et al. Activation mechanisms of STAT5 by oncogenic Flt3-ITD. *Blood*. 2007 Jul 1;110(1):370-4.
2. Steelman LS, Chappell WH, Abrams SL, Kempf RC, Long J, Laidler P, et al. Roles of the Raf/MEK/ERK and PI3K/PTEN/Akt/mTOR pathways in controlling growth and sensitivity to therapy-implications for cancer and aging. *Aging*. 2011 Mar;3(3):192-222.
3. Dail M, Wong J, Lawrence J, O'Connor D, Nakitandwe J, Chen SC, et al. Loss of oncogenic Notch1 with resistance to a PI3K inhibitor in T-cell leukaemia. *Nature*. 2014 Sep 25;513(7519):512-6.

| Parent No. | Unique patient number (UPN) | Parent No. in International AMP2 Study <sup>1</sup> | Primary chromosomal abnormality | Downstage | Whole Exome Sequencing | SNP 6.0 array | MLPA - PDS31ZFP-1A1 IN | NFAS Sequencing | KRAS Sequencing | BRAF Sequencing | PTPN11 Sequencing | FIT3 Sequencing | NF1 Sequencing | Human Microarray validation and selective exons sequencing (Screen B) |
|------------|-----------------------------|-----------------------------------------------------|---------------------------------|-----------|------------------------|---------------|------------------------|-----------------|-----------------|-----------------|-------------------|-----------------|----------------|-----------------------------------------------------------------------|
| 1          | 23229                       | 437                                                 | JAMP21                          | Diagnosis | Y                      | Y             | Y                      | 454             | 454             | 454             | 454               | 454             | 454            | Y                                                                     |
| 1b         | 23229                       |                                                     |                                 | Remission | Y                      | Y             |                        |                 |                 |                 |                   |                 |                | Y                                                                     |
| 2          | 11095                       | 416                                                 | JAMP21                          | Diagnosis | Y                      | Y             | Y                      | 454             | 454             | 454             | 454               | 454             | 454            | Y                                                                     |
| 2b         | 11095                       |                                                     |                                 | Remission | Y                      | Y             |                        |                 |                 |                 |                   |                 |                | Y                                                                     |
| 3          | 11564                       | 421                                                 | JAMP21                          | Diagnosis | Y                      | Y             | Y                      | 454             | 454             | 454             | 454               | 454             | 454            | Y                                                                     |
| 3b         | 11564                       |                                                     |                                 | Remission | Y                      | Y             |                        |                 |                 |                 |                   |                 |                | Y                                                                     |
| 4          | 22129                       | 432                                                 | JAMP21                          | Diagnosis | Y                      | Y             | Y                      | 454             | 454             | 454             | 454               | 454             | 454            | Y                                                                     |
| 4b         | 22129                       |                                                     |                                 | Remission | Y                      | Y             |                        |                 |                 |                 |                   |                 |                | Y                                                                     |
| 5          | 24259                       | 446                                                 | JAMP21                          | Diagnosis | Y                      | Y             | Y                      | 454             | 454             | 454             | 454               | 454             | 454            | Y                                                                     |
| 5b         | 24207                       |                                                     |                                 | Remission | Y                      | Y             |                        |                 |                 |                 |                   |                 |                | Y                                                                     |
| 6          | 2904                        | 451                                                 | JAMP21                          | Diagnosis | Y                      | Y             | Y                      | 454             | 454             | 454             | 454               | 454             | 454            | Y                                                                     |
| 6b         | 2904                        |                                                     |                                 | Remission | Y                      | Y             |                        |                 |                 |                 |                   |                 |                | Y                                                                     |
| 7          | 24259                       | 447                                                 | JAMP21                          | Diagnosis | Y                      | Y             | Y                      | 454             | 454             | 454             | 454               | 454             | 454            | Y                                                                     |
| 7b         | 24259                       |                                                     |                                 | Remission | Y                      | Y             |                        |                 |                 |                 |                   |                 |                | Y                                                                     |
| 8          | 22007                       | 431                                                 | JAMP21                          | Diagnosis | Y                      | Y             | Y                      | 454             | 454             | 454             | 454               | 454             | 454            | Y                                                                     |
| 8b         | 22007                       |                                                     |                                 | Remission | Y                      | Y             |                        |                 |                 |                 |                   |                 |                | Y                                                                     |
| 9          | 5988                        | 451                                                 | JAMP21                          | Diagnosis | Y                      | Y             | Y                      | 454             | 454             | 454             | 454               | 454             | 454            | Y                                                                     |
| 9b         | 5988                        |                                                     |                                 | Remission | Y                      | Y             |                        |                 |                 |                 |                   |                 |                | Y                                                                     |
| 10         | 3382                        | 453                                                 | JAMP21                          | Diagnosis | Y                      | Y             | Y                      | 454             | 454             | 454             | 454               | 454             | 454            | Y                                                                     |
| 11         | 22340                       | 434                                                 | JAMP21                          | Diagnosis | Y                      | Y             | Y                      | 454             | 454             | 454             | 454               | 454             | 454            | Y                                                                     |
| 11b        | 22340                       |                                                     |                                 | Remission | Y                      | Y             |                        |                 |                 |                 |                   |                 |                | Y                                                                     |
| 12         | 8743                        | 505                                                 | JAMP21                          | Diagnosis | Y                      | Y             | Y                      | 454             | 454             | 454             | 454               | 454             | 454            | Y                                                                     |
| 12b        | 8743                        |                                                     |                                 | Relapse   | Y                      | Y             |                        |                 |                 |                 |                   |                 |                | Y                                                                     |
| 13         | 12085                       | 424                                                 | JAMP21                          | Diagnosis | Y                      | Y             | Y                      | 454             | 454             | 454             | 454               | 454             | 454            | Y                                                                     |
| 13b        | 12085                       |                                                     |                                 | Remission | Y                      | Y             |                        |                 |                 |                 |                   |                 |                | Y                                                                     |
| 14         | 21567                       | 430                                                 | JAMP21                          | Diagnosis | Y                      | Y             | Y                      | 454             | 454             | 454             | IM                | 454             |                | Y                                                                     |
| 14b        | 21567                       |                                                     |                                 | Remission | Y                      | Y             |                        |                 |                 |                 |                   |                 |                | Y                                                                     |
| 15         | 23222                       | 433                                                 | JAMP21                          | Diagnosis | Y                      | Y             | Y                      | 454             | 454             | 454             | 454               | 454             | 454            | Y                                                                     |
| 15b        | 23222                       |                                                     |                                 | Remission | Y                      | Y             |                        |                 |                 |                 |                   |                 |                | Y                                                                     |
| 16         | 20724                       | 429                                                 | JAMP21                          | Diagnosis | Y                      | Y             | Y                      | 454             | 454             | 454             | 454               | 454             | 454            | Y                                                                     |
| 16b        | 20724                       |                                                     |                                 | Remission | Y                      | Y             |                        |                 |                 |                 |                   |                 |                | Y                                                                     |
| 17         | 6783                        | 456                                                 | JAMP21                          | Diagnosis | Y                      | Y             | Y                      | 454             | 454             | 454             | 454               | 454             | 454            | Y                                                                     |
| 18         | 9864                        | 512                                                 | JAMP21                          | Diagnosis | Y                      | Y             | Y                      | 454             | 454             | 454             | 454               | 454             | 454            | Y                                                                     |
| 19         | 3743                        | 456                                                 | JAMP21                          | Diagnosis | Y                      | Y             | Y                      | 454             | 454             | 454             | 454               | 454             | 454            | Y                                                                     |
| 20         | 5674                        | 477                                                 | JAMP21                          | Diagnosis | Y                      | Y             | Y                      | 454             | 454             | 454             | 454               | 454             | 454            | Y                                                                     |
| 21         | 23982                       | 444                                                 | JAMP21                          | Diagnosis | Y                      | Y             | Y                      | 454             | 454             | 454             | 454               | 454             | 454            | Y                                                                     |
| 21b        | 23982                       |                                                     |                                 | Remission | Y                      | Y             |                        |                 |                 |                 |                   |                 |                | Y                                                                     |
| 22         | 25452                       | 521                                                 | JAMP21                          | Diagnosis | Y                      | Y             |                        | IM              | IM              | IM              | IM                | IM              | IM             | Y                                                                     |
| 23         | 25453                       | 522                                                 | JAMP21                          | Diagnosis | Y                      | Y             |                        | IM              | IM              | IM              | IM                | IM              | IM             | Y                                                                     |
| 24         | 25454                       | 523                                                 | JAMP21                          | Diagnosis | Y                      | Y             |                        | IM              | IM              | IM              | IM                | IM              | IM             | Y                                                                     |
| 24b        | 25454                       |                                                     |                                 | Relapse   | Y                      | Y             |                        | IM              | IM              | IM              | IM                | IM              | IM             | Y                                                                     |
| 25         | 25455                       | 524                                                 | JAMP21                          | Diagnosis | Y                      | Y             |                        | IM              | IM              | IM              | IM                | IM              | IM             | Y                                                                     |
| 26         | 24655                       | 195                                                 | JAMP21                          | Diagnosis | Y                      | Y             |                        | 454             | 454             | 454             | 454               | 454             | 454            | Y                                                                     |
| 26b        | 24655                       |                                                     |                                 | Remission | Y                      | Y             |                        |                 |                 |                 |                   |                 |                | Y                                                                     |
| 27         | 23765                       | 442                                                 | JAMP21                          | Diagnosis | Y                      | Y             | Y                      | 454             | 454             | 454             | 454               | 454             | 454            | Y                                                                     |
| 27b        | 23765                       |                                                     |                                 | Remission | Y                      | Y             |                        |                 |                 |                 |                   |                 |                | Y                                                                     |
| 28         | 9028                        | 511                                                 | JAMP21                          | Diagnosis | Y                      | Y             | Y                      | 454             | 454             | 454             | 454               | 454             | 454            | Y                                                                     |
| 28b        | 9028                        |                                                     |                                 | Remission | Y                      | Y             |                        |                 |                 |                 |                   |                 |                | Y                                                                     |
| 29         | 24447                       | 300                                                 | JAMP21                          | Diagnosis | Y                      | Y             | Y                      | 454             | 454             | 454             | 454               | 454             | 454            | Y                                                                     |
| 30         | 24442                       | 300                                                 | JAMP21                          | Diagnosis | Y                      | Y             | Y                      | 454             | 454             | 454             | IM                | 454             | 454            | Y                                                                     |
| 31         | 6028                        | 452                                                 | JAMP21                          | Diagnosis | Y                      | Y             | Y                      | 454             | 454             | 454             | 454               | 454             | 454            | Y                                                                     |
| 32         | 11061                       | 417                                                 | JAMP21                          | Diagnosis | Y                      | Y             | Y                      | 454             | 454             | 454             | 454               | 454             | 454            | Y                                                                     |
| 33         | 4134                        | 461                                                 | JAMP21                          | Diagnosis | Y                      | Y             | Y                      | 454             | 454             | 454             | 454               | 454             | 454            | Y                                                                     |
| 33b        | 4134                        |                                                     |                                 | Relapse   | Y                      | Y             |                        | 454             | 454             | 454             | 454               | 454             | 454            | Y                                                                     |
| 34         | 4279                        | 465                                                 | JAMP21                          | Diagnosis | Y                      | Y             | Y                      | 454             | 454             | 454             | 454               | 454             | 454            | Y                                                                     |
| 34b        | 4279                        |                                                     |                                 | Relapse   | Y                      | Y             |                        | 454             | 454             | 454             | 454               | 454             | 454            | Y                                                                     |
| 35         | 4780                        | 473                                                 | JAMP21                          | Diagnosis | Y                      | Y             | Y                      | 454             | 454             | 454             | IM                | 454             | 454            | Y                                                                     |
| 35b        | 4780                        |                                                     |                                 | Relapse   | Y                      | Y             |                        | 454             | 454             | 454             | 454               | 454             | 454            | Y                                                                     |
| 36         | 4405                        | 467                                                 | JAMP21                          | Diagnosis | Y                      | Y             | Y                      | 454             | 454             | 454             | 454               | 454             | 454            | Y                                                                     |
| 36b        | 4405                        |                                                     |                                 | Relapse   | Y                      | Y             |                        |                 |                 |                 |                   |                 |                | Y                                                                     |
| 37         | 7828                        | 502                                                 | JAMP21                          | Diagnosis | Y                      | Y             | Y                      | 454             | 454             | 454             | 454               | 454             | 454            | Y                                                                     |
| 38         | 11154                       | 418                                                 | JAMP21                          | Diagnosis | Y                      | Y             | Y                      | 454             | 454             | 454             | 454               | 454             | 454            | Y                                                                     |
| 39         | 11557                       | 420                                                 | JAMP21                          | Diagnosis | Y                      | Y             | Y                      | 454             | 454             | 454             | 454               | 454             | 454            | Y                                                                     |
| 40         | 6996                        | 491                                                 | JAMP21                          | Diagnosis | Y                      | Y             | Y                      | 454             | 454             | 454             | 454               | 454             | 454            | Y                                                                     |
| 41         | 6788                        | 487                                                 | JAMP21                          | Diagnosis | Y                      | Y             | Y                      | 454             | 454             | 454             | IM                | 454             | 454            | Y                                                                     |
| 42         | 24454                       | 372                                                 | JAMP21                          | Diagnosis | Y                      | Y             | Y                      | 454             | 454             | 454             | 454               | 454             | 454            | Y                                                                     |
| 43         | 23299                       | 439                                                 | JAMP21                          | Diagnosis | Y                      | Y             | Y                      |                 |                 |                 |                   |                 |                | Y                                                                     |
| 43b        | 23299                       |                                                     |                                 | Remission | Y                      | Y             |                        |                 |                 |                 |                   |                 |                | Y                                                                     |
| 44         | 23886                       | 444                                                 | JAMP21                          | Diagnosis | Y                      | Y             | Y                      |                 |                 |                 |                   |                 |                | Y                                                                     |
| 44b        | 23886                       |                                                     |                                 | Remission | Y                      | Y             |                        |                 |                 |                 |                   |                 |                | Y                                                                     |
| 45         | 19578                       | 426                                                 | JAMP21                          | Diagnosis | Y                      | Y             |                        | IM              | IM              |                 | IM                | IM              |                | Y                                                                     |
| 46a        | 23317                       |                                                     |                                 | Relapse   | Y                      | Y             |                        | IM              | IM              |                 | IM                | IM              |                | Y                                                                     |
| 47         | 8447                        |                                                     | B-other                         | Diagnosis | Y                      | Y             | Y                      | Y               | Y               | Y               | Y                 | Y               | Y              | Y                                                                     |
| 48         | 9148                        |                                                     | B-other                         | Diagnosis | Y                      | Y             | Y                      | Y               | Y               | Y               | Y                 | Y               | Y              | Y                                                                     |
| 49         | 9465                        |                                                     | B-other                         | Diagnosis | Y                      | Y             | Y                      | Y               | Y               | Y               | Y                 | Y               | Y              | Y                                                                     |
| 50         | 9625                        |                                                     | B-other                         | Diagnosis | Y                      | Y             | Y                      | Y               | Y               | Y               | Y                 | Y               | Y              | Y                                                                     |
| 51         | 9659                        |                                                     | B-other                         | Diagnosis | Y                      | Y             | Y                      | Y               | Y               | Y               | Y                 | Y               | Y              | Y                                                                     |
| 52         | 9877                        |                                                     | B-other                         | Diagnosis | Y                      | Y             | Y                      | Y               | Y               | Y               | Y                 | Y               | Y              | Y                                                                     |
| 53         | 10054                       |                                                     | B-other                         | Diagnosis | Y                      | Y             | Y                      | Y               | Y               | Y               | Y                 | Y               | Y              | Y                                                                     |
| 54         | 10077                       |                                                     | B-other                         | Diagnosis | Y                      | Y             | Y                      | Y               | Y               | Y               | Y                 | Y               | Y              | Y                                                                     |
| 55         | 10121                       |                                                     | B-other                         | Diagnosis | Y                      | Y             | Y                      | Y               | Y               | Y               | Y                 | Y               | Y              | Y                                                                     |
| 56         | 10184                       |                                                     | B-other                         | Diagnosis | Y                      | Y             | Y                      | Y               | Y               | Y               | Y                 | Y               | Y              | Y                                                                     |
| 57         | 10186                       |                                                     | B-other                         | Diagnosis | Y                      | Y             | Y                      | Y               | Y               | Y               | Y                 | Y               | Y              | Y                                                                     |
| 58         | 10297                       |                                                     | B-other                         | Diagnosis | Y                      | Y             | Y                      | Y               | Y               | Y               | Y                 | Y               | Y              | Y                                                                     |
| 59         | 10419                       |                                                     | B-other                         | Diagnosis | Y                      | Y             | Y                      | Y               | Y               | Y               | Y                 | Y               | Y              | Y                                                                     |
| 60         | 10442                       |                                                     | B-other                         | Diagnosis | Y                      | Y             | Y                      | Y               | Y               | Y               | Y                 | Y               | Y              | Y                                                                     |
| 61         | 10656                       |                                                     | B-other                         | Diagnosis | Y                      | Y             | Y                      | Y               | Y               | Y               | Y                 | Y               | Y              | Y                                                                     |
| 62         | 10743                       |                                                     | B-other                         | Diagnosis | Y                      | Y             | Y                      | Y               | Y               | Y               | Y                 | Y               | Y              | Y                                                                     |
| 63         | 10817                       |                                                     | B-other                         | Diagnosis | Y                      | Y             | Y                      | Y               | Y               | Y               | Y                 | Y               | Y              | Y                                                                     |
| 64         | 11104                       |                                                     | B-other                         | Diagnosis | Y                      | Y             | Y                      | Y               | Y               | Y               | Y                 | Y               | Y              | Y                                                                     |
| 65         | 11111                       |                                                     | B-other                         | Diagnosis | Y                      | Y             | Y                      | Y               | Y               | Y               | Y                 | Y               | Y              | Y                                                                     |
| 66         | 11380                       |                                                     | B-other                         | Diagnosis | Y                      | Y             | Y                      | Y               | Y               | Y               | Y                 | Y               | Y              | Y                                                                     |
| 67         | 11832                       |                                                     | B-other                         | Diagnosis | Y                      | Y             | Y                      | Y               | Y               | Y               | Y                 | Y               | Y              | Y                                                                     |
| 68         | 11889                       |                                                     | B-other                         | Diagnosis | Y                      | Y             | Y                      | Y               | Y               | Y               | Y                 | Y               | Y              | Y                                                                     |
| 69         | 11967                       |                                                     | B-other                         | Diagnosis | Y                      | Y             | Y                      | Y               | Y               | Y               | Y                 | Y               | Y              | Y                                                                     |
| 70         | 12021                       |                                                     | B-other                         | Diagnosis | Y                      | Y             | Y                      | Y               | Y               | Y               | Y                 | Y               | Y              | Y                                                                     |
| 71         | 12085                       |                                                     | B-other                         | Diagnosis | Y                      | Y             | Y                      | Y               | Y               | Y               | Y                 | Y               | Y              | Y                                                                     |
| 72         | 12324                       |                                                     | B-other                         | Diagnosis | Y                      | Y             | Y                      | Y               | Y               | Y               | Y                 | Y               | Y              | Y                                                                     |
| 73         | 12476                       |                                                     | B-other                         | Diagnosis | Y                      | Y             | Y                      | Y               | Y               | Y               | Y                 | Y               | Y              | Y                                                                     |
| 74         | 12654                       |                                                     | B-other                         | Diagnosis | Y                      | Y             | Y                      | Y               | Y               | Y               | Y                 | Y               | Y              | Y                                                                     |
| 75         | 20323                       |                                                     | B-other                         | Diagnosis | Y                      | Y             | Y                      | Y               | Y               | Y               | Y                 | Y               | Y              | Y                                                                     |
| 76         | 20515                       |                                                     | B-other                         | Diagnosis | Y                      | Y             | Y                      | Y               | Y               | Y               | Y                 | Y               | Y              | Y                                                                     |
| 77         | 20546                       |                                                     | B-other                         | Diagnosis | Y                      | Y             | Y                      | Y               | Y               | Y               | Y                 | Y               | Y              | Y                                                                     |
| 78         | 20574                       |                                                     | B-other                         | Diagnosis | Y                      | Y             | Y                      | Y               | Y               | Y               | Y                 | Y               | Y              | Y                                                                     |
| 79         | 20663                       |                                                     | B-other                         | Diagnosis | Y                      | Y             | Y                      | Y               | Y               | Y               | Y                 | Y               | Y              | Y                                                                     |
| 80         | 20729                       |                                                     | B-other                         | Diagnosis | Y                      | Y             | Y                      | Y               | Y               | Y               | Y                 | Y               | Y              | Y                                                                     |
| 81         | 20716                       |                                                     | B-other                         | Diagnosis | Y                      | Y             | Y                      | Y               | Y               | Y               | Y                 | Y               | Y              | Y                                                                     |
| 82         | 20720                       |                                                     | B-other                         | Diagnosis | Y                      | Y             | Y                      | Y               | Y               | Y               | Y                 | Y               | Y              | Y                                                                     |
| 83         | 20748                       |                                                     | B-other                         | Diagnosis | Y                      | Y             | Y                      | Y               | Y               | Y               | Y                 | Y               | Y              | Y                                                                     |
| 84         | 20750                       |                                                     | B-other                         | Diagnosis | Y                      | Y             | Y                      | Y               | Y               | Y               | Y                 | Y               | Y              | Y                                                                     |
| 85         | 20753                       |                                                     | B-other                         | Diagnosis | Y                      | Y             | Y                      | Y               | Y               | Y               | Y                 | Y               | Y              | Y                                                                     |
| 86         | 20759                       |                                                     | B-other                         | Diagnosis | Y                      | Y             | Y                      | Y               | Y               | Y               | Y                 | Y               | Y              | Y                                                                     |
| 87         | 20764                       |                                                     | B-other                         | Diagnosis | Y                      | Y             | Y                      | Y               | Y               | Y               | Y                 | Y               | Y              | Y                                                                     |
| 88         | 20874                       |                                                     | B-other                         | Diagnosis | Y                      | Y             | Y                      | Y               | Y               | Y               | Y                 | Y               | Y              | Y                                                                     |
| 89         | 21198                       |                                                     | B-other                         | Diagnosis | Y                      | Y             | Y                      | Y               | Y               | Y               | Y                 | Y               | Y              | Y                                                                     |
| 90         | 21207                       |                                                     | B-other                         | Diagnosis | Y                      | Y             | Y                      | Y               | Y               | Y               | Y                 | Y               | Y              | Y                                                                     |
| 91         | 21208                       |                                                     | B-other                         | Diagnosis | Y                      | Y             | Y                      | Y               | Y               | Y               | Y                 | Y               | Y              | Y                                                                     |
| 92         | 22194                       |                                                     | B-other                         | Diagnosis | Y                      | Y             | Y                      | Y               | Y               | Y               | Y                 | Y               | Y              | Y                                                                     |
| 93         | 22381                       |                                                     | B-other                         | Diagnosis | Y                      | Y             | Y                      | Y               | Y               | Y               | Y                 | Y               | Y              | Y                                                                     |
| 94         | 22389                       |                                                     | B-other                         | Diagnosis | Y                      | Y             | Y                      | Y               |                 |                 |                   |                 |                |                                                                       |



|     |       |     |           |  |  |   |   |  |  |   |  |
|-----|-------|-----|-----------|--|--|---|---|--|--|---|--|
| 120 | 10576 | HeH | Diagnosis |  |  | Y | Y |  |  | Y |  |
| 121 | 10826 | HeH | Diagnosis |  |  | Y | Y |  |  | Y |  |
| 122 | 10831 | HeH | Diagnosis |  |  | Y | Y |  |  | Y |  |
| 123 | 10720 | HeH | Diagnosis |  |  | Y | Y |  |  | Y |  |
| 124 | 10740 | HeH | Diagnosis |  |  | Y | Y |  |  | Y |  |
| 125 | 10837 | HeH | Diagnosis |  |  | Y | Y |  |  | Y |  |
| 126 | 10998 | HeH | Diagnosis |  |  | Y | Y |  |  | Y |  |
| 127 | 11103 | HeH | Diagnosis |  |  | Y | Y |  |  | Y |  |
| 128 | 11154 | HeH | Diagnosis |  |  | Y | Y |  |  | Y |  |
| 129 | 11301 | HeH | Diagnosis |  |  | Y | Y |  |  | Y |  |
| 130 | 11407 | HeH | Diagnosis |  |  | Y | Y |  |  | Y |  |
| 131 | 11570 | HeH | Diagnosis |  |  | Y | Y |  |  | Y |  |
| 132 | 11635 | HeH | Diagnosis |  |  | Y | Y |  |  | Y |  |
| 133 | 11674 | HeH | Diagnosis |  |  | Y | Y |  |  | Y |  |
| 134 | 11735 | HeH | Diagnosis |  |  | Y | Y |  |  | Y |  |
| 135 | 11984 | HeH | Diagnosis |  |  | Y | Y |  |  | Y |  |
| 136 | 12325 | HeH | Diagnosis |  |  | Y | Y |  |  | Y |  |
| 137 | 12376 | HeH | Diagnosis |  |  | Y | Y |  |  | Y |  |
| 138 | 13028 | HeH | Diagnosis |  |  | Y | Y |  |  | Y |  |
| 139 | 12728 | HeH | Diagnosis |  |  | Y | Y |  |  | Y |  |
| 140 | 12747 | HeH | Diagnosis |  |  | Y | Y |  |  | Y |  |
| 141 | 18636 | HeH | Diagnosis |  |  | Y | Y |  |  | Y |  |
| 142 | 19764 | HeH | Diagnosis |  |  | Y | Y |  |  | Y |  |
| 143 | 19994 | HeH | Diagnosis |  |  | Y | Y |  |  | Y |  |
| 144 | 20384 | HeH | Diagnosis |  |  | Y | Y |  |  | Y |  |
| 145 | 20712 | HeH | Diagnosis |  |  | Y | Y |  |  | Y |  |
| 146 | 20781 | HeH | Diagnosis |  |  | Y | Y |  |  | Y |  |
| 147 | 21346 | HeH | Diagnosis |  |  | Y | Y |  |  | Y |  |
| 148 | 21635 | HeH | Diagnosis |  |  | Y | Y |  |  | Y |  |
| 149 | 21750 | HeH | Diagnosis |  |  | Y | Y |  |  | Y |  |
| 150 | 21998 | HeH | Diagnosis |  |  | Y | Y |  |  | Y |  |
| 151 | 22147 | HeH | Diagnosis |  |  | Y | Y |  |  | Y |  |
| 152 | 22238 | HeH | Diagnosis |  |  | Y | Y |  |  | Y |  |
| 153 | 22341 | HeH | Diagnosis |  |  | Y | Y |  |  | Y |  |
| 154 | 22420 | HeH | Diagnosis |  |  | Y | Y |  |  | Y |  |
| 155 | 22434 | HeH | Diagnosis |  |  | Y | Y |  |  | Y |  |
| 156 | 22486 | HeH | Diagnosis |  |  | Y | Y |  |  | Y |  |
| 157 | 22076 | HeH | Diagnosis |  |  | Y | Y |  |  | Y |  |
| 158 | 22799 | HeH | Diagnosis |  |  | Y | Y |  |  | Y |  |
| 159 | 22928 | HeH | Diagnosis |  |  | Y | Y |  |  | Y |  |
| 160 | 23031 | HeH | Diagnosis |  |  | Y | Y |  |  | Y |  |

**Supplementary Table 1: A summary of genetic studies per patient sample used in this study.** Studies were approved by the relevant institutional ethics committee(s) and written informed consent was obtained for each patient from parents, legal guardians or themselves. The cohort was comprised of 46 samples from patients with IAMP21-ALL. Cases 1-44 were derived from patient material which was used to investigate the incidence of RAS mutations in IAMP21-ALL. Patients 45 and 46b refers to the xenograft material of the patient sample, viable cells were used as a control to assess the effect of selumetinib in IAMP21-ALL (Supplementary Figure 6). Matched remission and/or relapse material was available for select IAMP21-ALL cases (highlighted in grey). Clinical and cytogenetic data is available from our previous studies.<sup>1,2</sup> IAMP21-ALL was confirmed in each case through the acquisition of multiple *RUNX1* signals (relative to *ETV6*) on interphase cells or metaphase spreads by FISH. 66 (patients 47-112) and 48 (patients 113-160) diagnostic patient samples with no recurrent chromosomal abnormality (defined as B-other) or high hyperdiploidy (HeH), respectively, were used in this study. Genetic studies performed in this study are highlighted in yellow and included SNP6.0 array, MLPA analysis (P335-RCZF1 kit) and targeted sequencing (using Roche 454 or Illumina MiSeq technology). Abbreviations: Y, analysis performed; 454, Roche 454 sequencing technology; M, Illumina MiSeq sequencing; F, failed.

#### References

- Harrison CJ, Moorman AV, Schwab C, Carroll AJ, Raetz EA, Devadas M, et al. An international study of intrachromosomal amplification of chromosome 21 (IAMP21): cytogenetic characterization and outcome. *Leukemia* : official journal of the Leukemia Society of America. Leukemia Research Fund, UK. 2014 May;28(5):1015-21.
- Rand V, Parker H, Russell LJ, Schwab C, Ersoz H, Irving J, et al. Genomic characterization implicates IAMP21 as a likely primary genetic event in childhood B-cell precursor acute lymphoblastic leukemia. *Blood*. 2011 Jun 23;117(25):6848-55.

| Patient ID | Disease stage | SNP 6.0 array | NRAS<br>chr1:15247084-115259515 | SOS1<br>chr2:39208689-39347604 | RAF1<br>chr3:12625099-12705700 | BRAF<br>chr7:140433812-140624564 | HRAS<br>chr11:532241-535550 | CBL<br>chr11:19076985-119178859 | KRAS<br>chr12:25358179-25403854 | PTPN11<br>chr12:112866535-112924727 | FLT3<br>chr13:28577410-28674729 | MAP2K1<br>chr15:86679210-86768882 | MAPK3<br>chr16:30125425-30134630 | CRK<br>chr17:1324646-1359561 | NF1<br>chr17:29421944-29704695 | GRB2<br>chr17:73314156-73401790 | MAP2K2<br>chr19:4090319-4124126 | MAPK1<br>chr22:22123318-22221970 | Copy number abnormality (CNA) information                                                                                              |
|------------|---------------|---------------|---------------------------------|--------------------------------|--------------------------------|----------------------------------|-----------------------------|---------------------------------|---------------------------------|-------------------------------------|---------------------------------|-----------------------------------|----------------------------------|------------------------------|--------------------------------|---------------------------------|---------------------------------|----------------------------------|----------------------------------------------------------------------------------------------------------------------------------------|
| 1          | Diagnosis     | Y             | 2                               | 2                              | 2                              | 1                                | 2                           | 2                               | 2                               | 2                                   | 2                               | 2                                 | 2                                | 2                            | 2                              | 2                               | 2                               | 2                                | BRAF loss, chr7:138489883-141615098, CN=1                                                                                              |
| 1b         | Remission     | Y             | 2                               | 2                              | 2                              | 2                                | 2                           | 2                               | 2                               | 2                                   | 2                               | 2                                 | 2                                | 2                            | 2                              | 2                               | 2                               | 2                                |                                                                                                                                        |
| 2          | Diagnosis     | Y             | 2                               | 2                              | 2                              | 2                                | 2                           | 2                               | 2                               | 2                                   | 2                               | 2                                 | 2                                | 2                            | 2                              | 2                               | 2                               | 2                                | MAPK1 gain, chr22, CN=3                                                                                                                |
| 2b         | Remission     | Y             | 2                               | 2                              | 2                              | 2                                | 2                           | 2                               | 2                               | 2                                   | 2                               | 2                                 | 2                                | 2                            | 2                              | 2                               | 2                               | 2                                |                                                                                                                                        |
| 3          | Diagnosis     | Y             | 2                               | 2                              | 2                              | 2                                | 2                           | 2                               | 2                               | 2                                   | 2                               | 2                                 | 2                                | 2                            | 2                              | 2                               | 2                               | 2                                |                                                                                                                                        |
| 3b         | Remission     | Y             | 2                               | 2                              | 2                              | 2                                | 2                           | 2                               | 2                               | 2                                   | 2                               | 2                                 | 2                                | 2                            | 2                              | 2                               | 2                               | 2                                |                                                                                                                                        |
| 4          | Diagnosis     | Y             | 2                               | 2                              | 2                              | 2                                | 2                           | 2                               | 2                               | 2                                   | 2                               | 2                                 | 2                                | 2                            | 2                              | 2                               | 2                               | 2                                |                                                                                                                                        |
| 4b         | Remission     | Y             | 2                               | 2                              | 2                              | 2                                | 2                           | 2                               | 2                               | 2                                   | 2                               | 2                                 | 2                                | 2                            | 2                              | 2                               | 2                               | 2                                |                                                                                                                                        |
| 5          | Diagnosis     | Y             | 2                               | 2                              | 2                              | 2                                | 2                           | 2                               | 2                               | 2                                   | 2                               | 2                                 | 2                                | 2                            | 2                              | 2                               | 2                               | 2                                |                                                                                                                                        |
| 5b         | Remission     | Y             | 2                               | 2                              | 2                              | 2                                | 2                           | 2                               | 2                               | 2                                   | 2                               | 2                                 | 2                                | 2                            | 2                              | 2                               | 2                               | 2                                |                                                                                                                                        |
| 6          | Diagnosis     | Y             | 2                               | 2                              | 2                              | 1                                | 2                           | 2                               | 2                               | 2                                   | 2                               | 2                                 | 2                                | 2                            | 2                              | 2                               | 2                               | 2                                | BRAF loss, chr7:123075091-159117317, CN=1                                                                                              |
| 6b         | Relapse       |               |                                 |                                |                                |                                  |                             |                                 |                                 |                                     |                                 |                                   |                                  |                              |                                |                                 |                                 |                                  |                                                                                                                                        |
| 7          | Diagnosis     | Y             | 2                               | 2                              | 2                              | 2                                | 2                           | 2                               | 2                               | 2                                   | 2                               | 2                                 | 2                                | 2                            | 2                              | 2                               | 2                               | 2                                |                                                                                                                                        |
| 7b         | Remission     | Y             | 2                               | 2                              | 2                              | 2                                | 2                           | 2                               | 2                               | 2                                   | 2                               | 2                                 | 2                                | 2                            | 2                              | 2                               | 2                               | 2                                |                                                                                                                                        |
| 8          | Diagnosis     | Y             | 2                               | 2                              | 2                              | 2                                | 2                           | 2                               | 2                               | 2                                   | 2                               | 2                                 | 2                                | 2                            | 2                              | 2                               | 2                               | 2                                |                                                                                                                                        |
| 8b         | Remission     | Y             | 2                               | 2                              | 2                              | 2                                | 2                           | 2                               | 2                               | 2                                   | 2                               | 2                                 | 2                                | 2                            | 2                              | 2                               | 2                               | 2                                |                                                                                                                                        |
| 9          | Diagnosis     | Y             | 2                               | 2                              | 2                              | 2                                | 2                           | 2                               | 2                               | 2                                   | 3                               | 2                                 | 2                                | 1                            | 3                              | 3                               | 2                               | 2                                | FLT3 gain chr13:28577688-28653242, CN=3<br>NF1 and GRB2 gain, chr17:21524160-81049726, CN=3<br>CRK loss, chr17:21524160-81049726, CN=1 |
| 9b         | Remission     | Y             | 2                               | 2                              | 2                              | 2                                | 2                           | 2                               | 2                               | 2                                   | 2                               | 2                                 | 2                                | 2                            | 2                              | 2                               | 2                               | 2                                |                                                                                                                                        |
| 10         | Diagnosis     | Y             | 2                               | 2                              | 2                              | 2                                | 1                           | 2                               | 2                               | 2                                   | 2                               | 2                                 | 2                                | 2                            | 2                              | 3                               | 2                               | 2                                | CBL loss, chr11:101085126-128054642, CN=1<br>GRB2 gain, chr17:40024271-80907559, CN=3                                                  |
| 11         | Diagnosis     | Y             | 2                               | 2                              | 2                              | 2                                | 2                           | 2                               | 2                               | 2                                   | 2                               | 2                                 | 2                                | 2                            | 2                              | 2                               | 2                               | 2                                |                                                                                                                                        |
| 11b        | Remission     | Y             | 2                               | 2                              | 2                              | 2                                | 2                           | 2                               | 2                               | 2                                   | 2                               | 2                                 | 2                                | 2                            | 2                              | 2                               | 2                               | 2                                |                                                                                                                                        |
| 12         | Diagnosis     | Y             | 2                               | 2                              | 2                              | 2                                | 1                           | 2                               | 2                               | 2                                   | 2                               | 2                                 | 2                                | 2                            | 2                              | 2                               | 2                               | 2                                | CBL loss, chr11:96439395-134944770, CN=1                                                                                               |
| 12b        | Relapse       | Y             | 2                               | 2                              | 2                              | 2                                | 1                           | 2                               | 2                               | 2                                   | 2                               | 2                                 | 2                                | 2                            | 2                              | 2                               | 2                               | 2                                | CBL loss, chr11:96439395-134944770, CN=1                                                                                               |
| 13         | Diagnosis     | Y             | 2                               | 2                              | 2                              | 2                                | 2                           | 2                               | 2                               | 2                                   | 2                               | 2                                 | 2                                | 1                            | 2                              | 2                               | 2                               | 2                                | NF1 loss chr17:27671072-30298842, CN=1                                                                                                 |
| 13b        | Remission     | Y             | 2                               | 2                              | 2                              | 2                                | 2                           | 2                               | 2                               | 2                                   | 2                               | 2                                 | 2                                | 2                            | 2                              | 2                               | 2                               | 2                                |                                                                                                                                        |
| 14         | Diagnosis     | Y             | 2                               | 2                              | 2                              | 2                                | 2                           | 2                               | 2                               | 2                                   | 2                               | 2                                 | 2                                | 3                            | 3                              | 3                               | 2                               | 2                                | NF1, GRB2 and CRK gain, chr17, CN=3                                                                                                    |
| 14b        | Remission     | Y             | 2                               | 2                              | 2                              | 2                                | 2                           | 2                               | 2                               | 2                                   | 2                               | 2                                 | 2                                | 2                            | 2                              | 2                               | 2                               | 2                                |                                                                                                                                        |
| 15         | Diagnosis     | Y             | 2                               | 2                              | 2                              | 2                                | 1                           | 2                               | 2                               | 2                                   | 2                               | 2                                 | 2                                | 2                            | 2                              | 2                               | 2                               | 2                                | CBL loss chr11:103700452-122725504, CN=1                                                                                               |
| 15b        | Remission     | Y             | 2                               | 2                              | 2                              | 2                                | 2                           | 2                               | 2                               | 2                                   | 2                               | 2                                 | 2                                | 2                            | 2                              | 2                               | 2                               | 2                                |                                                                                                                                        |
| 16         | Diagnosis     | Y             | 2                               | 2                              | 2                              | 2                                | 2                           | 2                               | 2                               | 2                                   | 2                               | 2                                 | 2                                | 2                            | 2                              | 2                               | 2                               | 2                                |                                                                                                                                        |
| 16b        | Remission     | Y             | 2                               | 2                              | 2                              | 2                                | 2                           | 2                               | 2                               | 2                                   | 2                               | 2                                 | 2                                | 2                            | 2                              | 2                               | 2                               | 2                                |                                                                                                                                        |
| 17         | Diagnosis     | Y             | 2                               | 2                              | 2                              | 2                                | 2                           | 2                               | 2                               | 2                                   | 2                               | 4                                 | 2                                | 2                            | 2                              | 2                               | 2                               | 2                                | MAP2K1 gain chr15:60309674-68683575, CN=4                                                                                              |
| 18         | Diagnosis     | Y             | 2                               | 2                              | 2                              | 2                                | 2                           | 2                               | 2                               | 2                                   | 2                               | 2                                 | 2                                | 2                            | 2                              | 2                               | 2                               | 2                                |                                                                                                                                        |
| 19         | Diagnosis     | Y             | 2                               | 2                              | 2                              | 2                                | 1                           | 2                               | 2                               | 2                                   | 2                               | 2                                 | 2                                | 2                            | 2                              | 2                               | 2                               | 2                                | CBL loss, chr11:78035832-134944770, CN=1                                                                                               |
| 20         | Diagnosis     | Y             | 2                               | 2                              | 2                              | 2                                | 2                           | 2                               | 2                               | 2                                   | 2                               | 2                                 | 2                                | 2                            | 2                              | 2                               | 2                               | 2                                |                                                                                                                                        |
| 21         | Diagnosis     | Y             | 2                               | 2                              | 2                              | 2                                | 2                           | 2                               | 2                               | 2                                   | 2                               | 2                                 | 2                                | 2                            | 2                              | 2                               | 2                               | 2                                |                                                                                                                                        |
| 21b        | Remission     | Y             | 2                               | 2                              | 2                              | 2                                | 2                           | 2                               | 2                               | 2                                   | 2                               | 2                                 | 2                                | 2                            | 2                              | 2                               | 2                               | 2                                |                                                                                                                                        |
| 22         | Diagnosis     | Y             | 2                               | 2                              | 2                              | 2                                | 2                           | 2                               | 2                               | 2                                   | 3                               | 2                                 | 2                                | 2                            | 2                              | 2                               | 2                               | 2                                | FLT3 gain, chr13:21197493-46080684, CN=3                                                                                               |
| 23         | Diagnosis     | Y             | 2                               | 2                              | 2                              | 2                                | 2                           | 2                               | 2                               | 2                                   | 2                               | 2                                 | 2                                | 2                            | 2                              | 2                               | 2                               | 2                                |                                                                                                                                        |
| 24         | Diagnosis     | Y             | 2                               | 2                              | 2                              | 1                                | 2                           | 2                               | 2                               | 2                                   | 2                               | 2                                 | 2                                | 2                            | 2                              | 2                               | 2                               | 2                                | BRAF loss chr7:120150796-159119708, CN=1                                                                                               |
| 24b        | Relapse       | Y             | 2                               | 2                              | 2                              | 1                                | 2                           | 2                               | 2                               | 2                                   | 2                               | 2                                 | 2                                | 2                            | 2                              | 2                               | 2                               | 2                                | BRAF loss chr7:120150796-159119708, CN=1                                                                                               |
| 25         | Diagnosis     | Y             | 2                               | 2                              | 2                              | 2                                | 2                           | 2                               | 2                               | 2                                   | 2                               | 2                                 | 2                                | 2                            | 2                              | 2                               | 2                               | 2                                |                                                                                                                                        |
| 26         | Diagnosis     | Y             | 2                               | 2                              | 2                              | 2                                | 2                           | 2                               | 2                               | 2                                   | 2                               | 2                                 | 2                                | 2                            | 2                              | 2                               | 2                               | 2                                |                                                                                                                                        |
| 26b        | Remission     | Y             | 2                               | 2                              | 2                              | 2                                | 2                           | 2                               | 2                               | 2                                   | 2                               | 2                                 | 2                                | 2                            | 2                              | 2                               | 2                               | 2                                |                                                                                                                                        |
| 43         | Diagnosis     | Y             | 2                               | 2                              | 2                              | 2                                | 1                           | 2                               | 2                               | 2                                   | 2                               | 3                                 | 2                                | 1                            | 2                              | 2                               | 2                               | 2                                | CBL loss chr11:89850834-134944770, CN=1<br>MAP2K1 gain chr15:62606091-71815395, CN=3<br>CRK loss chr17:0-16571504, CN=1                |
| 43b        | Remission     | Y             | 2                               | 2                              | 2                              | 2                                | 2                           | 2                               | 2                               | 2                                   | 2                               | 2                                 | 2                                | 2                            | 2                              | 2                               | 2                               | 2                                |                                                                                                                                        |
| 44         | Diagnosis     | Y             | 2                               | 2                              | 2                              | 2                                | 2                           | 2                               | 2                               | 2                                   | 2                               | 2                                 | 2                                | 2                            | 2                              | 2                               | 2                               | 2                                |                                                                                                                                        |
| 44b        | Remission     | Y             | 2                               | 2                              | 2                              | 2                                | 2                           | 2                               | 2                               | 2                                   | 2                               | 2                                 | 2                                | 2                            | 2                              | 2                               | 2                               | 2                                |                                                                                                                                        |

**Supplementary Table 2: Copy number status of RAS pathway genes in iAMP21-ALL.** SNP6.0 copy number profiling was performed on 28 diagnostic and 2 relapse iAMP21-ALL patient samples. Matched remission material was available for 17 cases. Arrays were prepared by The Paterson Institute Microarray Service (Manchester, UK) or AROS Applied Biotechnology AS (Aarhus, Denmark). Copy number and segmentation analysis was performed using Genotyping Console version 4.1.4 (Affymetrix, Santa Clara, California, USA). Regions of genomic gain and loss were confirmed by manual assessment. Matched remission samples facilitated the exclusion of germline copy number variants (CNV) and were used to eliminate potential germline variants in unmatched diagnostic samples, in addition to the list of CNV reported in the Toronto Database of Genomic Variants (DGV). Regions of CNA were mapped in relation to the Genome Reference Consortium Human genome build 37 (GRCh37). The copy number status of 16 genes that represent components of the RAS pathway is shown. Most deletions formed part of a larger abnormality (T) which was often visible by karyotype analysis.

**Supplementary Table 3: Primer sequences used to screen and validate RAS pathway mutations.** A) Primers were used to screen for RAS pathway mutations using the Roche 454 FLX and / or Illumina MiSeq. RAS pathway primers were composed of the consensus sequence (red text) for binding of the Access Array Barcode Library primers and the target-specific sequence (black text). *NRAS*, *KRAS*, *BRAF*, and *NF1* primers have been described previously. 1-3 Primers targeting *NRAS* exon 2 and *FLT3* exon 16 were used to validate putative mutations identified by whole exome sequencing using Sanger sequencing. B) Primers used to amplify *FLT3* transcripts that harbour ITD mutations, designed to bind to exons 13 (forward primer) and 16 (reverse primer). CS1 - tag, consensus sequence 1; CS2 - tag, consensus sequence 2.

| A) Sequencing Primers for RAS Pathway Analysis |            |        |                                            | Illumina MiSeq Sequencing Primers for RAS Pathway Analysis (if different) |                                       |                                       |  |
|------------------------------------------------|------------|--------|--------------------------------------------|---------------------------------------------------------------------------|---------------------------------------|---------------------------------------|--|
| Gene Name                                      | Chromosome | Exon # | Forward primer sequence (+ CS1 - tag)      | Reverse primer sequence (+ CS2 - tag)                                     | Forward primer sequence (+ CS1 - tag) | Reverse primer sequence (+ CS2 - tag) |  |
| <i>KRAS</i>                                    | 1          | 2      | ACACTGAGACATGGTCTACACGGTCTGGCACTCAAGTGAAT  | TACGGTAGCAGAGACTTGGTCTAGAAATGGTCTGCCACCACTGAA                             |                                       |                                       |  |
| <i>KRAS</i>                                    | 1          | 3      | ACACTGAGACATGGTCTACACGGTCTGGCACTCAAGTGAAT  | TACGGTAGCAGAGACTTGGTCTAGAAATGGTCTGCCACCACTGAA                             |                                       |                                       |  |
| <i>NRAS</i>                                    | 12         | 2      | ACACTGAGACATGGTCTACACGGCAGATTAATCCGGTGT    | TACGGTAGCAGAGACTTGGTCTCCGCAAGTGAAGAGAGAGG                                 |                                       |                                       |  |
| <i>NRAS</i>                                    | 12         | 3      | ACACTGAGACATGGTCTACACCCCTCCCTCCCTCCCTAC    | TACGGTAGCAGAGACTTGGTCTCAATGTCAAAACCACTTAAAGC                              |                                       |                                       |  |
| <i>BRAF</i>                                    | 11         | 11     | ACACTGAGACATGGTCTACATCTCTGTTATCCCTCTCAGG   | TACGGTAGCAGAGACTTGGTCTAGTTTATATGCGGAACAGTGA                               |                                       |                                       |  |
| <i>BRAF</i>                                    | 15         | 11     | ACACTGAGACATGGTCTACATCTCTGTTATCCCTCTCAGG   | TACGGTAGCAGAGACTTGGTCTAGTTTATATGCGGAACAGTGA                               |                                       |                                       |  |
| <i>PTPN11</i>                                  | 12         | 2      | ACACTGAGACATGGTCTACAGGACAGGGAAGGCTGTGAT    | TACGGTAGCAGAGACTTGGTCTAATGSCAGGGCAAGCACTG                                 |                                       |                                       |  |
| <i>PTPN11</i>                                  | 12         | 3      | ACACTGAGACATGGTCTACACGGTCTGGTGGTCTTTCTCA   | TACGGTAGCAGAGACTTGGTCTCACAGGGGAGCAAGCAAGT                                 |                                       |                                       |  |
| <i>PTPN11</i>                                  | 12         | 5      | ACACTGAGACATGGTCTACAGAGGTCTGAAACCACTAATGTA | TACGGTAGCAGAGACTTGGTCTGTATGTTGAAGCTGCAATG                                 |                                       |                                       |  |
| <i>PTPN11</i>                                  | 12         | 6      | ACACTGAGACATGGTCTACACCTCTGCTGGCTCTTATG     | TACGGTAGCAGAGACTTGGTCTGTGTCAATCAATGGCCGAT                                 |                                       |                                       |  |
| <i>PTPN11</i>                                  | 12         | 7      | ACACTGAGACATGGTCTACACGGTCTGGCACTCAAGCAAT   | TACGGTAGCAGAGACTTGGTCTCCGATGTGTAAACAAGGACA                                |                                       |                                       |  |
| <i>PTPN11</i>                                  | 12         | 8      | ACACTGAGACATGGTCTACACGGTCTGGCACTCAAGCAAT   | TACGGTAGCAGAGACTTGGTCTCCGATGTGTAAACAAGGACA                                |                                       |                                       |  |
| <i>PTPN11</i>                                  | 12         | 9      | ACACTGAGACATGGTCTACATCACTGATGTAAGCTTGGCTT  | TACGGTAGCAGAGACTTGGTCTTCTTAAACATGSCCACTG                                  |                                       |                                       |  |
| <i>PTPN11</i>                                  | 12         | 10     | ACACTGAGACATGGTCTACAGAGTGGCAAAAGGCCAAT     | TACGGTAGCAGAGACTTGGTCTGAGTACGGCAAGCACTGTA                                 |                                       |                                       |  |
| <i>PTPN11</i>                                  | 11.1       | 11     | ACACTGAGACATGGTCTACATGAAACCGGGTGTCTCTCTCA  | TACGGTAGCAGAGACTTGGTCTTCTTCTGCTCTCTCTCTCA                                 |                                       |                                       |  |
| <i>PTPN11</i>                                  | 12         | 11.2   | ACACTGAGACATGGTCTACACAGCTGTCCCTGCTCTCTCA   | TACGGTAGCAGAGACTTGGTCTCCACCACTCAATACCTTACA                                |                                       |                                       |  |
| <i>PTPN11</i>                                  | 12         | 12     | ACACTGAGACATGGTCTACACAGGCAAGTGTACTGAGAA    | TACGGTAGCAGAGACTTGGTCTCGTAGCACTTCTCTCCAT                                  |                                       |                                       |  |
| <i>PTPN11</i>                                  | 12         | 13     | ACACTGAGACATGGTCTACACTGTGCACTGCAACATGTC    | TACGGTAGCAGAGACTTGGTCTCAAGAGGCTCAAGAAAGAA                                 |                                       |                                       |  |
| <i>PTPN11</i>                                  | 12         | 14     | ACACTGAGACATGGTCTACACCTCACTGTGCACTGCTTC    | TACGGTAGCAGAGACTTGGTCTCCCAATGCTGCTGCTCTCA                                 |                                       |                                       |  |
| <i>PTPN11</i>                                  | 12         | 15     | ACACTGAGACATGGTCTACATCTCTCCCTGGGAATGTGAG   | TACGGTAGCAGAGACTTGGTCTCCCAATGCTGCTGCTCTCA                                 |                                       |                                       |  |
| <i>FLT3</i>                                    | 13         | 2      | ACACTGAGACATGGTCTACATGGTCTCACAGAGAGAGAGCA  | TACGGTAGCAGAGACTTGGTCTGGTAGAGAGATGCGCAAA                                  |                                       |                                       |  |
| <i>FLT3</i>                                    | 13         | 3      | ACACTGAGACATGGTCTACATGGTCTCACAGAGAGAGAGCA  | TACGGTAGCAGAGACTTGGTCTGGTAGAGAGATGCGCAAA                                  |                                       |                                       |  |
| <i>FLT3</i>                                    | 13         | 4      | ACACTGAGACATGGTCTACACAGGAGAGAGAGAGAGG      | TACGGTAGCAGAGACTTGGTCTCTTCCAGTGGAGAGATG                                   |                                       |                                       |  |
| <i>FLT3</i>                                    | 13         | 5      | ACACTGAGACATGGTCTACAGCAGACTCTGTGAGGGTTT    | TACGGTAGCAGAGACTTGGTCTCCACACCGGTAACCTCTCA                                 |                                       |                                       |  |
| <i>FLT3</i>                                    | 13         | 6      | ACACTGAGACATGGTCTACATTTGGCAAAAGTGTAGAGCTG  | TACGGTAGCAGAGACTTGGTCTGGCTGTAATGATCCCTCAT                                 |                                       |                                       |  |
| <i>FLT3</i>                                    | 13         | 7      | ACACTGAGACATGGTCTACATTTGGCAAAAGTGTAGAGCTG  | TACGGTAGCAGAGACTTGGTCTGGCTGTAATGATCCCTCAT                                 |                                       |                                       |  |
| <i>FLT3</i>                                    | 13         | 8      | ACACTGAGACATGGTCTACAGGGTCTGCTTAAAGACTGTC   | TACGGTAGCAGAGACTTGGTCTCAGAGAACAGGCGCTCTCA                                 |                                       |                                       |  |
| <i>FLT3</i>                                    | 13         | 9      | ACACTGAGACATGGTCTACACATGCTGGCTTCTCTATAA    | TACGGTAGCAGAGACTTGGTCTGCAAACTCTTGTGTCTATA                                 |                                       |                                       |  |
| <i>FLT3</i>                                    | 13         | 10     | ACACTGAGACATGGTCTACATGCTGCTTGTGCTGCTCT     | TACGGTAGCAGAGACTTGGTCTGTGAGGCTCTCTCAAGTA                                  |                                       |                                       |  |
| <i>FLT3</i>                                    | 13         | 11     | ACACTGAGACATGGTCTACATGCTGCTTGTGCTGCTCT     | TACGGTAGCAGAGACTTGGTCTGTGAGGCTCTCTCAAGTA                                  |                                       |                                       |  |
| <i>FLT3</i>                                    | 13         | 12     | ACACTGAGACATGGTCTACACTCTGGAACTCCCATTTGA    | TACGGTAGCAGAGACTTGGTCTCTCTTCACTCGGTGAGTAC                                 |                                       |                                       |  |
| <i>FLT3</i>                                    | 13         | 13     | ACACTGAGACATGGTCTACATCACTGCACTGCACTGCACT   | TACGGTAGCAGAGACTTGGTCTTCCATCTGATGCAAGCTGAC                                |                                       |                                       |  |
| <i>FLT3</i>                                    | 13         | 14     | ACACTGAGACATGGTCTACATCACTGCACTGCACTGCACT   | TACGGTAGCAGAGACTTGGTCTTCCATCTGATGCAAGCTGAC                                |                                       |                                       |  |
| <i>FLT3</i>                                    | 13         | 15     | ACACTGAGACATGGTCTACATTTGATGCTCCCTCTAAGCACT | TACGGTAGCAGAGACTTGGTCTCCAGTGAAGCTTCAAGTGGAG                               |                                       |                                       |  |
| <i>FLT3</i>                                    | 13         | 16     | ACACTGAGACATGGTCTACAACTCAATGATGATTTGCTTCA  | TACGGTAGCAGAGACTTGGTCTTCTTCAATGATTTCCCTATGA                               |                                       |                                       |  |
| <i>FLT3</i>                                    | 13         | 17     | ACACTGAGACATGGTCTACACACTCAATGATGATTTGCTTCA | TACGGTAGCAGAGACTTGGTCTTCTTCAATGATTTCCCTATGA                               |                                       |                                       |  |
| <i>FLT3</i>                                    | 13         | 18     | ACACTGAGACATGGTCTACATGCTGCACTGCACTGCACT    | TACGGTAGCAGAGACTTGGTCTTCCAGTGAAGCTTCAAGTGGAG                              |                                       |                                       |  |
| <i>FLT3</i>                                    | 13         | 19     | ACACTGAGACATGGTCTACAGCTGCACTGCACTGCACT     | TACGGTAGCAGAGACTTGGTCTTCCAGTGAAGCTTCAAGTGGAG                              |                                       |                                       |  |
| <i>FLT3</i>                                    | 13         | 20     | ACACTGAGACATGGTCTACAGCTGCACTGCACTGCACT     | TACGGTAGCAGAGACTTGGTCTTCCAGTGAAGCTTCAAGTGGAG                              |                                       |                                       |  |
| <i>FLT3</i>                                    | 13         | 21     | ACACTGAGACATGGTCTACAGCTGCACTGCACTGCACT     | TACGGTAGCAGAGACTTGGTCTTCCAGTGAAGCTTCAAGTGGAG                              |                                       |                                       |  |
| <i>FLT3</i>                                    | 13         | 22     | ACACTGAGACATGGTCTACATTTAGCCATGGTAGGCTCAA   | TACGGTAGCAGAGACTTGGTCTAGTGGCCAACTTCTCTGAT                                 |                                       |                                       |  |
| <i>FLT3</i>                                    | 13         | 23     | ACACTGAGACATGGTCTACATTTAGCCATGGTAGGCTCAA   | TACGGTAGCAGAGACTTGGTCTAGTGGCCAACTTCTCTGAT                                 |                                       |                                       |  |
| <i>FLT3</i>                                    | 13         | 24     | ACACTGAGACATGGTCTACAGGGCAAGTGTGGGGCAAGT    | TACGGTAGCAGAGACTTGGTCTGCACTTAAAGAGGCCACT                                  |                                       |                                       |  |
| <i>NF1</i>                                     | 17         | 2      | ACACTGAGACATGGTCTACATGGTCTCACAGAGAGAGAGCA  | TACGGTAGCAGAGACTTGGTCTGGTAGAGAGATGCGCAAA                                  |                                       |                                       |  |
| <i>NF1</i>                                     | 17         | 3      | ACACTGAGACATGGTCTACATGGTCTCACAGAGAGAGAGCA  | TACGGTAGCAGAGACTTGGTCTGGTAGAGAGATGCGCAAA                                  |                                       |                                       |  |
| <i>NF1</i>                                     | 17         | 4      | ACACTGAGACATGGTCTACATGCTGCACTGCACTGCACT    | TACGGTAGCAGAGACTTGGTCTTCCAGTGAAGCTTCAAGTGGAG                              |                                       |                                       |  |
| <i>NF1</i>                                     | 17         | 5      | ACACTGAGACATGGTCTACATGCTGCACTGCACTGCACT    | TACGGTAGCAGAGACTTGGTCTTCCAGTGAAGCTTCAAGTGGAG                              |                                       |                                       |  |
| <i>NF1</i>                                     | 17         | 6      | ACACTGAGACATGGTCTACATGCTGCACTGCACTGCACT    | TACGGTAGCAGAGACTTGGTCTTCCAGTGAAGCTTCAAGTGGAG                              |                                       |                                       |  |
| <i>NF1</i>                                     | 17         | 7      | ACACTGAGACATGGTCTACAGCTGCACTGCACTGCACT     | TACGGTAGCAGAGACTTGGTCTTCCAGTGAAGCTTCAAGTGGAG                              |                                       |                                       |  |
| <i>NF1</i>                                     | 17         | 8      | ACACTGAGACATGGTCTACATTTTAAAGTGTGGCTTGGT    | TACGGTAGCAGAGACTTGGTCTAGGCTCAAGTAACTGCACT                                 |                                       |                                       |  |
| <i>NF1</i>                                     | 17         | 9      | ACACTGAGACATGGTCTACATTTTAAAGTGTGGCTTGGT    | TACGGTAGCAGAGACTTGGTCTAGGCTCAAGTAACTGCACT                                 |                                       |                                       |  |
| <i>NF1</i>                                     | 17         | 10     | ACACTGAGACATGGTCTACATTTTAAAGTGTGGCTTGGT    | TACGGTAGCAGAGACTTGGTCTAGGCTCAAGTAACTGCACT                                 |                                       |                                       |  |
| <i>NF1</i>                                     | 17         | 11     | ACACTGAGACATGGTCTACATTTTAAAGTGTGGCTTGGT    | TACGGTAGCAGAGACTTGGTCTAGGCTCAAGTAACTGCACT                                 |                                       |                                       |  |
| <i>NF1</i>                                     | 17         | 12     | ACACTGAGACATGGTCTACATTTTAAAGTGTGGCTTGGT    | TACGGTAGCAGAGACTTGGTCTAGGCTCAAGTAACTGCACT                                 |                                       |                                       |  |
| <i>NF1</i>                                     | 17         | 13     | ACACTGAGACATGGTCTACATTTTAAAGTGTGGCTTGGT    | TACGGTAGCAGAGACTTGGTCTAGGCTCAAGTAACTGCACT                                 |                                       |                                       |  |
| <i>NF1</i>                                     | 17         | 14     | ACACTGAGACATGGTCTACATTTTAAAGTGTGGCTTGGT    | TACGGTAGCAGAGACTTGGTCTAGGCTCAAGTAACTGCACT                                 |                                       |                                       |  |
| <i>NF1</i>                                     | 17         | 15     | ACACTGAGACATGGTCTACATTTTAAAGTGTGGCTTGGT    | TACGGTAGCAGAGACTTGGTCTAGGCTCAAGTAACTGCACT                                 |                                       |                                       |  |
| <i>NF1</i>                                     | 17         | 16     | ACACTGAGACATGGTCTACATTTTAAAGTGTGGCTTGGT    | TACGGTAGCAGAGACTTGGTCTAGGCTCAAGTAACTGCACT                                 |                                       |                                       |  |
| <i>NF1</i>                                     | 17         | 17     | ACACTGAGACATGGTCTACATTTTAAAGTGTGGCTTGGT    | TACGGTAGCAGAGACTTGGTCTAGGCTCAAGTAACTGCACT                                 |                                       |                                       |  |
| <i>NF1</i>                                     | 17         | 18     | ACACTGAGACATGGTCTACATTTTAAAGTGTGGCTTGGT    | TACGGTAGCAGAGACTTGGTCTAGGCTCAAGTAACTGCACT                                 |                                       |                                       |  |
| <i>NF1</i>                                     | 17         | 19     | ACACTGAGACATGGTCTACATTTTAAAGTGTGGCTTGGT    | TACGGTAGCAGAGACTTGGTCTAGGCTCAAGTAACTGCACT                                 |                                       |                                       |  |
| <i>NF1</i>                                     | 17         | 20     | ACACTGAGACATGGTCTACATTTTAAAGTGTGGCTTGGT    | TACGGTAGCAGAGACTTGGTCTAGGCTCAAGTAACTGCACT                                 |                                       |                                       |  |
| <i>NF1</i>                                     | 17         | 21.1   | ACACTGAGACATGGTCTACATTTTAAAGTGTGGCTTGGT    | TACGGTAGCAGAGACTTGGTCTAGGCTCAAGTAACTGCACT                                 |                                       |                                       |  |
| <i>NF1</i>                                     | 17         | 21.2   | ACACTGAGACATGGTCTACATTTTAAAGTGTGGCTTGGT    | TACGGTAGCAGAGACTTGGTCTAGGCTCAAGTAACTGCACT                                 |                                       |                                       |  |
| <i>NF1</i>                                     | 17         | 22     | ACACTGAGACATGGTCTACATTTTAAAGTGTGGCTTGGT    | TACGGTAGCAGAGACTTGGTCTAGGCTCAAGTAACTGCACT                                 |                                       |                                       |  |
| <i>NF1</i>                                     | 17         | 23     | ACACTGAGACATGGTCTACATTTTAAAGTGTGGCTTGGT    | TACGGTAGCAGAGACTTGGTCTAGGCTCAAGTAACTGCACT                                 |                                       |                                       |  |
| <i>NF1</i>                                     | 17         | 24     | ACACTGAGACATGGTCTACATTTTAAAGTGTGGCTTGGT    | TACGGTAGCAGAGACTTGGTCTAGGCTCAAGTAACTGCACT                                 |                                       |                                       |  |
| <i>NF1</i>                                     | 17         | 25     | ACACTGAGACATGGTCTACATTTTAAAGTGTGGCTTGGT    | TACGGTAGCAGAGACTTGGTCTAGGCTCAAGTAACTGCACT                                 |                                       |                                       |  |
| <i>NF1</i>                                     | 17         | 26     | ACACTGAGACATGGTCTACATTTTAAAGTGTGGCTTGGT    | TACGGTAGCAGAGACTTGGTCTAGGCTCAAGTAACTGCACT                                 |                                       |                                       |  |
| <i>NF1</i>                                     | 17         | 27     | ACACTGAGACATGGTCTACATTTTAAAGTGTGGCTTGGT    | TACGGTAGCAGAGACTTGGTCTAGGCTCAAGTAACTGCACT                                 |                                       |                                       |  |
| <i>NF1</i>                                     | 17         | 28     | ACACTGAGACATGGTCTACATTTTAAAGTGTGGCTTGGT    | TACGGTAGCAGAGACTTGGTCTAGGCTCAAGTAACTGCACT                                 |                                       |                                       |  |
| <i>NF1</i>                                     | 17         | 29     | ACACTGAGACATGGTCTACATTTTAAAGTGTGGCTTGGT    | TACGGTAGCAGAGACTTGGTCTAGGCTCAAGTAACTGCACT                                 |                                       |                                       |  |
| <i>NF1</i>                                     | 17         | 30     | ACACTGAGACATGGTCTACATTTTAAAGTGTGGCTTGGT    | TACGGTAGCAGAGACTTGGTCTAGGCTCAAGTAACTGCACT                                 |                                       |                                       |  |
| <i>NF1</i>                                     | 17         | 31     | ACACTGAGACATGGTCTACATTTTAAAGTGTGGCTTGGT    | TACGGTAGCAGAGACTTGGTCTAGGCTCAAGTAACTGCACT                                 |                                       |                                       |  |
| <i>NF1</i>                                     | 17         | 32     | ACACTGAGACATGGTCTACATTTTAAAGTGTGGCTTGGT    | TACGGTAGCAGAGACTTGGTCTAGGCTCAAGTAACTGCACT                                 |                                       |                                       |  |
| <i>NF1</i>                                     | 17         | 33     | ACACTGAGACATGGTCTACATTTTAAAGTGTGGCTTGGT    | TACGGTAGCAGAGACTTGGTCTAGGCTCAAGTAACTGCACT                                 |                                       |                                       |  |
| <i>NF1</i>                                     | 17         | 34     | ACACTGAGACATGGTCTACATTTTAAAGTGTGGCTTGGT    | TACGGTAGCAGAGACTTGGTCTAGGCTCAAGTAACTGCACT                                 |                                       |                                       |  |
| <i>NF1</i>                                     | 17         | 35     | ACACTGAGACATGGTCTACATTTTAAAGTGTGGCTTGGT    | TACGGTAGCAGAGACTTGGTCTAGGCTCAAGTAACTGCACT                                 |                                       |                                       |  |
| <i>NF1</i>                                     | 17         | 36     | ACACTGAGACATGGTCTACATTTTAAAGTGTGGCTTGGT    | TACGGTAGCAGAGACTTGGTCTAGGCTCAAGTAACTGCACT                                 |                                       |                                       |  |
| <i>NF1</i>                                     | 17         | 37.1   | ACACTGAGACATGGTCTACATTTTAAAGTGTGGCTTGGT    | TACGGTAGCAGAGACTTGGTCTAGGCTCAAGTAACTGCACT                                 |                                       |                                       |  |
| <i>NF1</i>                                     | 17         | 37.2   | ACACTGAGACATGGTCTACATTTTAAAGTGTGGCTTGGT    | TACGGTAGCAGAGACTTGGTCTAGGCTCAAGTAACTGCACT                                 |                                       |                                       |  |
| <i>NF1</i>                                     | 17         | 38.1   | ACACTGAGACATGGTCTACATTTTAAAGTGTGGCTTGGT    | TACGGTAGCAGAGACTTGGTCTAGGCTCAAGTAACTGCACT                                 |                                       |                                       |  |
| <i>NF1</i>                                     | 17         | 38.2   | ACACTGAGACATGGTCTACATTTTAAAGTGTGGCTTGGT    | TACGGTAGCAGAGACTTGGTCTAGGCTCAAGTAACTGCACT                                 |                                       |                                       |  |
| <i>NF1</i>                                     | 17         | 39     | ACACTGAGACATGGTCTACATTTTAAAGTGTGGCTTGGT    | TACGGTAGCAGAGACTTGGTCTAGGCTCAAGTAACTGCACT                                 |                                       |                                       |  |
| <i>NF1</i>                                     | 17         | 40     | ACACTGAGACATGGTCTACATTTTAAAGTGTGGCTTGGT    | TACGGTAGCAGAGACTTGGTCTAGGCTCAAGTAACTGCACT                                 |                                       |                                       |  |
| <i>NF1</i>                                     | 17         | 41     | ACACTGAGACATGGTCTACATTTTAAAGTGTGGCTTGGT    | TACGGTAGCAGAGACTTGGTCTAGGCTCAAGTAACTGCACT                                 |                                       |                                       |  |
| <i>NF1</i>                                     | 17         | 42     | ACACTGAGACATGGTCTACATTTTAAAGTGTGGCTTGGT    | TACGGTAGCAGAGACTTGGTCTAGGCTCAAGTAACTGCACT                                 |                                       |                                       |  |
| <i>NF1</i>                                     | 17         | 43     | ACACTGAGACATGGTCTACATTTTAAAGTGTGGCTTGGT    | TACGGTAGCAGAGACTTGGTCTAGGCTCAAGTAACTGCACT                                 |                                       |                                       |  |
| <i>NF1</i>                                     | 17         | 44     | ACACTGAGACATGGTCTACATTTTAAAGTGTGGCTTGGT    | TACGGTAGCAGAGACTTGGTCTAGGCTCAAGTAACTGCACT                                 |                                       |                                       |  |
| <i>NF1</i>                                     | 17         | 45     | ACACTGAGACATGGTCTACATTTTAAAGTGTGGCTTGGT    | TACGGTAGCAGAGACTTGGTCTAGGCTCAAGTAACTGCACT                                 |                                       |                                       |  |
| <i>NF1</i>                                     | 17         | 46     | ACACTGAGACATGGTCTACATTTTAAAGTGTGGCTTGGT    | TACGGTAGCAGAGACTTGGTCTAGGCTCAAGTAACTGCACT                                 |                                       |                                       |  |
| <i>NF1</i>                                     | 17         | 47     | ACACTGAGACATGGTCTACATTTTAAAGTGTGGCTTGGT    | TACGGTAGCAGAGACTTGGTCTAGGCTCAAGTAACTGCACT                                 |                                       |                                       |  |
| <i>NF1</i>                                     | 17         | 48     | ACACTGAGACATGGTCTACATTTTAAAGTGTGGCTTGGT    | TACGGTAGCAGAGACTTGGTCTAGGCTCAAGTAACTGCACT                                 |                                       |                                       |  |
| <i>NF1</i>                                     | 17         | 49     | ACACTGAGACATGGTCTACATTTTAAAGTGTGGCTTGGT    | TACGGTAGCAGAGACTTGGTCTAGGCTCAAGTAACTGCACT                                 |                                       |                                       |  |
| <i>NF1</i>                                     | 17         | 50     | ACACTGAGACATGGTCTACATTTTAAAGTGTGGCTTGGT    | TACGGTAGCAGAGACTTGGTCTAGGCTCAAGTAACTGCACT                                 |                                       |                                       |  |
| <i>NF1</i>                                     | 17         | 51     | ACACTGAGACATGGTCTACATTTTAAAGTGTGGCTTGGT    | TACGGTAGCAGAGACTTGGTCTAGGCTCAAGTAACTGCACT                                 |                                       |                                       |  |
| <i>NF1</i>                                     | 17         | 52     | ACACTGAGACATGGTCTACATTTTAAAGTGTGGCTTGGT    | TACGGTAGCAGAGACTTGGTCTAGGCTCAAGTAACTGCACT                                 |                                       |                                       |  |
| <i>NF1</i>                                     | 17         | 53     | ACACTGAGACATGGTCTACATTTTAAAGTGTGGCTTGGT    | TACGGTAGCAGAGACTTGGTCTAGGCTCAAGTAACTGCACT                                 |                                       |                                       |  |
| <i>NF1</i>                                     | 17         | 54     | ACACTGAGACATGGTCTACATTTTAAAGTGTGGCTTGGT    | TACGGTAGCAGAGACTTGGTCTAGGCTCAAGTAACTGCACT                                 |                                       |                                       |  |
| <i>NF1</i>                                     | 17         | 55     | ACACTGAGACATGGTCTACATTTTAAAGTGTGGCTTGGT    | TACGGTAGCAGAGACTTGGTCTAGGCTCAAGTAACTGCACT                                 |                                       |                                       |  |
| <i>NF1</i>                                     | 17         | 56     | ACACTGAGACATGGTCTACATTTTAAAGTGTGGCTTGGT    | TACGGTAGCAGAGACTTGGTCTAGGCTCAAGTAACTGCACT                                 |                                       |                                       |  |
| <i>NF1</i>                                     | 17         | 57     | ACACTGAGACATGGTCTACATTTTAAAGTGTGGCTTGGT    | TACGGTAGCAGAGACTTGGTCTAGGCTCAAGTAACTGCACT                                 |                                       |                                       |  |
| <i>NF1</i>                                     | 17         | 58     | ACACTGAGACATGGTCTACATTTTAAAGTGTGGCTTGGT    | TACGGTAGCAGAGACTTGGTCTAGGCTCAAGTAACTGCACT                                 |                                       |                                       |  |

**References**  
 1. Grossmann V, Kohlmann A, Zenger M, Schindels S, Eder C, Weissmann S, et al. A deep-sequencing study of chronic myeloid leukemia patients in blast crisis (BC-CML) detects mutations in 76.9% of cases. *Leukemia* : official journal of the Leukemia Society of America, Leukemia Research Fund. UK. 2011 Mar;25(3):557-60.  
 2. Halerach C, Grossmann V, Kohlmann A, Schindels S, Kern W, Schindels S, et al. Deletion of the tumor-suppressor gene NF1 occurs in 5% of myeloid malignancies and is accompanied by a mutation in the remaining allele in half of the cases. *Leukemia* : official journal of the Leukemia Society of America, Leukemia Research Fund. UK. 2012 Apr;26(4):834-9.  
 3. Grossmann V, Bacher U, Arturi V, Kohlmann A, Nadarajah N, Kern W, et al. Molecular analysis of RAS-RAF tyrosine-kinase signaling pathway alterations in patients with plasma cell myeloma. *Blood cancer journal*. 2012;2:e85.

| Patient No. | Chromosome | Hg19 Genome Position (bp) | Gene     | Exon   | Reference allele | Alternative allele | Mutation details |        | Diagnosis (Ref.) | Remission (Ref.) | Amino acid position | Reference amino acid | Mutated amino acid | Type of mutation  | Polyphen2 Protein-damaging prediction | MutationTaster Protein-damaging prediction | SIFT Protein-damaging prediction | Sanger sequence validation | Targeted sequencing validation |
|-------------|------------|---------------------------|----------|--------|------------------|--------------------|------------------|--------|------------------|------------------|---------------------|----------------------|--------------------|-------------------|---------------------------------------|--------------------------------------------|----------------------------------|----------------------------|--------------------------------|
|             |            |                           |          |        |                  |                    | DBSNP site       | VAR ID |                  |                  |                     |                      |                    |                   |                                       |                                            |                                  |                            |                                |
| 1           | chr1       | 17085006                  | MSTP9    | 11/15  | C                | T                  | DBSNP            | 8      | 3                | 490              | G                   | E                    | Missense           | Probably damaging | -                                     | -                                          | -                                | -                          |                                |
| 1           | chr1       | 215345248                 | KCNK2    | 5/7    | C                | T                  | NOVEL            | 60     | 0                | 227              | A                   | V                    | Missense           | Possibly damaging | Disease-causing mutation              | -                                          | Yes                              | Yes                        |                                |
| 1           | chr1       | 23788466                  | RYR2     | 12/105 | G                | A                  | NOVEL            | 318    | 0                | 318              | D                   | N                    | Missense           | Benign            | Disease-causing mutation              | -                                          | Yes                              | Yes                        |                                |
| 1           | chr2       | 33788636                  | RASGEF3  | 12/17  | G                | A                  | NOVEL            | 98     | 0                | 445              | E                   | N                    | Missense           | Probably damaging | Disease-causing mutation              | -                                          | Yes                              | Yes                        |                                |
| 1           | chr2       | 7774691                   | TGTM4    | 3/4    | C                | T                  | NOVEL            | 46     | 0                | 102              | E                   | K                    | Missense           | Benign            | Disease-causing mutation              | -                                          | Yes                              | Yes                        |                                |
| 1           | chr3       | 13586952                  | CLASP2   | 13/38  | G                | A                  | NOVEL            | 51     | 0                | 1267             | H                   | Y                    | Missense           | Probably damaging | Disease-causing mutation              | -                                          | Yes                              | Yes                        |                                |
| 1           | chr3       | 44929267                  | LRR14    | 3/4    | C                | T                  | NOVEL            | 50     | 0                | 64               | Q                   | *                    | Frameshift         | Probably damaging | Disease-causing mutation              | -                                          | Yes                              | Yes                        |                                |
| 1           | chr6       | 5613493                   | FARS2    | 6/7    | G                | A                  | NOVEL            | 11     | 0                | 136              | R                   | Q                    | Missense           | Probably damaging | Disease-causing mutation              | -                                          | Yes                              | Yes                        |                                |
| 1           | chr9       | 12654104                  | NR6F1    | 5/7    | G                | A                  | NOVEL            | 10     | 0                | 379              | R                   | Q                    | Missense           | Probably damaging | Disease-causing mutation              | -                                          | Yes                              | Yes                        |                                |
| 1           | chr12      | 6697096                   | CHD4     | 24/40  | C                | G                  | NOVEL            | 44     | 0                | 1162             | R                   | P                    | Missense           | Probably damaging | Disease-causing mutation              | -                                          | Yes                              | Yes                        |                                |
| 1           | chr12      | 22059189                  | ABC9     | 20/38  | G                | A                  | NOVEL            | 48     | 0                | 497              | E                   | K                    | Missense           | Probably damaging | Disease-causing mutation              | -                                          | Yes                              | Yes                        |                                |
| 1           | chr12      | 2888679                   | ITPK2    | 20/57  | G                | A                  | NOVEL            | 41     | 0                | 851              | P                   | S                    | Missense           | Probably damaging | Disease-causing mutation              | -                                          | Yes                              | Yes                        |                                |
| 1           | chr12      | 5841421                   | OR6K74   | 1/1    | C                | T                  | NOVEL            | 43     | 0                | 117              | S                   | F                    | Missense           | Probably damaging | Disease-causing mutation              | -                                          | Yes                              | Yes                        |                                |
| 1           | chr12      | 62778031                  | USP15    | 10/21  | G                | A                  | NOVEL            | 10     | 0                | 445              | R                   | H                    | Missense           | Probably damaging | Disease-causing mutation              | -                                          | Yes                              | Yes                        |                                |
| 1           | chr12      | 73837965                  | SYT1     | 9/10   | A                | C                  | NOVEL            | 43     | 0                | 354              | Q                   | P                    | Missense           | Probably damaging | Disease-causing mutation              | -                                          | Yes                              | Yes                        |                                |
| 1           | chr12      | 8525229-86527290          | SLCB1A5  | 11/12  | C                | T                  | TT               | NOVEL  | 47               | 0                | 593                 | G                    | R                  | Missense          | Possibly damaging                     | Disease-causing mutation                   | -                                | Yes                        | Yes                            |
| 1           | chr15      | 48784689                  | FBN1     | 24/66  | C                | T                  | NOVEL            | 47     | 0                | 941              | M                   | I                    | Missense           | Benign            | Disease-causing mutation              | -                                          | Yes                              | Yes                        |                                |
| 1           | chr16      | 794854                    | NARFL    | 5/11   | C                | T                  | NOVEL            | 59     | 0                | 153              | D                   | N                    | Missense           | Probably damaging | Disease-causing mutation              | -                                          | Yes                              | Yes                        |                                |
| 1           | chr16      | 23999752                  | DNAH3    | 47/62  | G                | A                  | NOVEL            | 10     | 0                | 2301             | R                   | W                    | Missense           | Probably damaging | Disease-causing mutation              | -                                          | Yes                              | Yes                        |                                |
| 1           | chr16      | 24580488                  | RBBP6    | 17/18  | G                | A                  | NOVEL            | 9      | 0                | 826              | R                   | H                    | Missense           | Probably damaging | Disease-causing mutation              | -                                          | Yes                              | Yes                        |                                |
| 1           | chr17      | 29653001                  | NF1      | 37/58  | C                | T                  | NOVEL            | 35     | 0                | 1667             | P                   | S                    | Missense           | Probably damaging | Disease-causing mutation              | -                                          | Yes                              | Yes                        |                                |
| 1           | chr17      | 4524397                   | CDC27    | 7/19   | G                | A                  | DBSNP            | 13     | 0                | 242              | P                   | S                    | Missense           | Benign            | Disease-causing mutation              | -                                          | Yes                              | Yes                        |                                |
| 1           | chr18      | 13031010                  | GREB1L   | 13/33  | C                | T                  | NOVEL            | 39     | 0                | 583              | E                   | Y                    | Missense           | Probably damaging | Disease-causing mutation              | -                                          | Yes                              | Yes                        |                                |
| 1           | chr20      | 3296513                   | ITCH     | 4/25   | G                | A                  | NOVEL            | 67     | 0                | 43               | V                   | I                    | Missense           | Probably damaging | Disease-causing mutation              | -                                          | Yes                              | Yes                        |                                |
| 1           | chr20      | 55803435                  | BMPT7    | 2/7    | C                | T                  | COSMIC           | 47     | 0                | 154              | R                   | Q                    | Missense           | Probably damaging | Disease-causing mutation              | -                                          | Yes                              | Yes                        |                                |
| 1           | chrX       | 102771749                 | GRF4     | 8/9    | A                | D                  | DBSNP            | 58     | 0                | 226              | R                   | W                    | Missense           | Probably damaging | Disease-causing mutation              | -                                          | Yes                              | Yes                        |                                |
| 1           | chrX       | 13040464                  | ICSF1    | 1/20   | G                | A                  | NOVEL            | 28     | 0                | 1058             | L                   | I                    | Missense           | Probably damaging | Disease-causing mutation              | -                                          | Yes                              | Yes                        |                                |
| 3           | chr1       | 16202472                  | C1orf110 | 4/4    | G                | C                  | DBSNP            | 4      | 0                | 251              | E                   | *                    | Missense           | Probably damaging | Disease-causing mutation              | -                                          | -                                | -                          |                                |
| 3           | chr1       | 24037020                  | FNIN2    | 5/18   | G                | C                  | NOVEL            | 33     | 0                | 670              | E                   | Q                    | Missense           | Probably damaging | Disease-causing mutation              | -                                          | -                                | Yes                        |                                |
| 3           | chr2       | 15607391                  | NBAS     | -      | G                | A                  | NOVEL            | 22     | 0                | -                | -                   | -                    | Splice site        | -                 | Disease-causing mutation              | -                                          | -                                | -                          |                                |
| 3           | chr2       | 37121091                  | STRN     | 7/18   | C                | G                  | NOVEL            | 25     | 0                | 294              | S                   | *                    | Truncation         | -                 | Disease-causing mutation              | -                                          | -                                | Yes                        |                                |
| 3           | chr2       | 62013329                  | COL4A3   | 9/8    | C                | T                  | DBSNP            | COSMIC | 1                | 0                | 565                 | M                    | M                  | Missense          | Probably damaging                     | Disease-causing mutation                   | -                                | Deleterious                | Yes                            |
| 3           | chr2       | 167136688                 | SCN9A    | 14/27  | C                | T                  | NOVEL            | 41     | 0                | 737              | L                   | F                    | Missense           | Benign            | Disease-causing mutation              | -                                          | Deleterious                      | Yes                        |                                |
| 3           | chr2       | 171811243                 | GORASP2  | 6/10   | G                | A                  | NOVEL            | 31     | 0                | 217              | G                   | E                    | Missense           | Benign            | Disease-causing mutation              | -                                          | Deleterious                      | Yes                        |                                |
| 3           | chr3       | 4680324                   | ITIH1    | 2/2    | G                | A                  | NOVEL            | 49     | 0                | 66               | T                   | P                    | NOVEL              | Probably damaging | Disease-causing mutation              | -                                          | Deleterious                      | Yes                        |                                |
| 3           | chr3       | 88205168                  | C3orf38  | -      | C                | G                  | NOVEL            | 26     | 0                | -                | -                   | -                    | Splice site        | -                 | Disease-causing mutation              | -                                          | -                                | -                          |                                |
| 3           | chr3       | 89579597                  | HERC3    | 10/38  | C                | G                  | NOVEL            | 22     | 0                | 367              | I                   | M                    | Missense           | Possibly damaging | Disease-causing mutation              | -                                          | Deleterious                      | Yes                        |                                |
| 3           | chr4       | 18245587                  | PPP1R1   | 7/19   | G                | A                  | NOVEL            | 15     | 0                | 2030             | D                   | K                    | Missense           | Benign            | Disease-causing mutation              | -                                          | -                                | -                          |                                |
| 3           | chr4       | 18763076                  | FAT1     | 2/27   | G                | A                  | NOVEL            | 15     | 0                | 86               | E                   | K                    | Missense           | Probably damaging | Disease-causing mutation              | -                                          | -                                | -                          |                                |
| 3           | chr5       | 111576501                 | EPB41L4A | 10/23  | G                | A                  | DBSNP            | COSMIC | 45               | 0                | 288                 | E                    | K                  | Missense          | Benign                                | Disease-causing mutation                   | -                                | Deleterious                | Yes                            |
| 3           | chr5       | 1460746138                | PCDHGA5  | 1/4    | C                | T                  | COSMIC           | 26     | 0                | 747              | R                   | W                    | Missense           | Probably damaging | Disease-causing mutation              | -                                          | Deleterious                      | Yes                        |                                |
| 3           | chr5       | 4912736                   | CKM13    | 12/14  | C                | T                  | NOVEL            | 15     | 0                | 1030             | D                   | N                    | Missense           | Probably damaging | Disease-causing mutation              | -                                          | -                                | -                          |                                |
| 3           | chr10      | 48371367                  | ZNF488   | 2/2    | G                | A                  | DBSNP            | NOVEL  | 2                | 0                | 289                 | D                    | N                  | Missense          | Probably damaging                     | Disease-causing mutation                   | -                                | Deleterious                | Yes                            |
| 3           | chr10      | 105372003                 | SH3PXD2A | 10/14  | G                | A                  | NOVEL            | 37     | 0                | 263              | V                   | I                    | Missense           | Possibly damaging | Disease-causing mutation              | -                                          | Deleterious                      | Yes                        |                                |
| 3           | chr11      | 63871536                  | ITIH4    | 14/14  | C                | T                  | NOVEL            | 33     | 0                | 524              | N                   | D                    | Missense           | Probably damaging | Disease-causing mutation              | -                                          | Deleterious                      | Yes                        |                                |
| 3           | chr11      | 7679027                   | CAPNS1   | 2/13   | T                | C                  | COSMIC           | 15     | 0                | 32               | F                   | S                    | Missense           | Possibly damaging | Disease-causing mutation              | -                                          | Deleterious                      | Yes                        |                                |
| 3           | chr12      | 20885882                  | SLCO1C1  | 10/15  | C                | T                  | NOVEL            | 40     | 0                | 409              | S                   | F                    | Missense           | Possibly damaging | Disease-causing mutation              | -                                          | Tolerated                        | Yes                        |                                |
| 3           | chr12      | 2621734                   | ITIH5    | 1/5    | G                | A                  | NOVEL            | 45     | 0                | 415              | K                   | N                    | Missense           | Probably damaging | Disease-causing mutation              | -                                          | Deleterious                      | Yes                        |                                |
| 3           | chr13      | 32813860                  | FRY      | 46/61  | G                | A                  | NOVEL            | 17     | 0                | 2177             | E                   | K                    | Missense           | Probably damaging | Disease-causing mutation              | -                                          | Deleterious                      | Yes                        |                                |
| 3           | chr13      | 33333821                  | POD5B    | 29/35  | C                | T                  | NOVEL            | 20     | 0                | 1122             | P                   | L                    | Missense           | Possibly damaging | Disease-causing mutation              | -                                          | Tolerated                        | Yes                        |                                |
| 3           | chr14      | 20404065                  | OR4K1    | 1/1    | G                | A                  | NOVEL            | 27     | 0                | 80               | K                   | N                    | Missense           | Probably damaging | Disease-causing mutation              | -                                          | Deleterious                      | Yes                        |                                |
| 3           | chr14      | 34418601                  | BMPL4    | 4/4    | G                | A                  | NOVEL            | 48     | 0                | 114              | N                   | S                    | Missense           | Probably damaging | Disease-causing mutation              | -                                          | Deleterious                      | Yes                        |                                |
| 3           | chr17      | 38830270                  | C17orf56 | 1/1    | C                | T                  | NOVEL            | 21     | 0                | 116              | P                   | L                    | Missense           | Probably damaging | Disease-causing mutation              | -                                          | Deleterious                      | Yes                        |                                |
| 3           | chr19      | 3454777                   | UBA2     | 7/17   | C                | T                  | NOVEL            | 39     | 0                | 204              | Q                   | K                    | Truncation         | Probably damaging | Disease-causing mutation              | -                                          | Deleterious                      | Yes                        |                                |
| 3           | chr19      | 89826168                  | ELAVL1   | 1/8    | G                | C                  | COSMIC           | 16     | 0                | 11415            | G                   | D                    | Missense           | Possibly damaging | Disease-causing mutation              | -                                          | -                                | -                          |                                |
| 3           | chr19      | 58151289                  | SETD2    | 31/31  | G                | C                  | NOVEL            | 19     | 0                | 410              | K                   | N                    | Missense           | Possibly damaging | Disease-causing mutation              | -                                          | Deleterious                      | Yes                        |                                |
| 3           | chrX       | 17788017                  | SCM1     | 4/15   | C                | T                  | NOVEL            | 43     | 0                | 89               | S                   | L                    | Missense           | Possibly damaging | Disease-causing mutation              | -                                          | Deleterious                      | Yes                        |                                |
| 3           | chrX       | 10786629                  | COL4A5   | 37/63  | C                | T                  | NOVEL            | 12     | 0                | 1105             | L                   | F                    | Missense           | Benign            | Disease-causing mutation              | -                                          | -                                | -                          |                                |
| 3           | chrX       | 11770722                  | DOCK11   | 12/53  | G                | C                  | NOVEL            | 19     | 0                | 410              | K                   | N                    | Missense           | Possibly damaging | Disease-causing mutation              | -                                          | Deleterious                      | Yes                        |                                |
| 5           | chr1       | 1275923                   | DVL1     | 10/15  | C                | G                  | NOVEL            | 28     | 0                | 331              | I                   | M                    | Missense           | Probably damaging | Disease-causing mutation              | -                                          | Deleterious                      | Yes                        |                                |
| 5           | chr1       | 13378716                  | GATAD2B  | 11/11  | A                | ACCCC              | NOVEL            | 52     | 0                | 573              | R                   | RGX                  | Frameshift         | Benign            | Disease-causing mutation              | -                                          | Deleterious                      | Yes                        |                                |
| 5           | chr1       | 171758675                 | METTL3   | 5/8    | G                | C                  | NOVEL            | 47     | 0                | 465              | D                   | H                    | Missense           | Probably damaging | Disease-causing mutation              | -                                          | Deleterious                      | Yes                        |                                |
| 5           | chr1       | 173483959                 | SLC3C2   | 20/28  | G                | C                  | NOVEL            | 11     | 0                | 835              | E                   | Q                    | Missense           | Possibly damaging | Disease-causing mutation              | -                                          | -                                | -                          |                                |
| 5           | chr1       | 18204917                  | TPS      | 4/20   | G                | A                  | NOVEL            | 31     | 0                | 2030             | R                   | K                    | Missense           | Probably damaging | Disease-causing mutation              | -                                          | -                                | -                          |                                |
| 5           | chr1       | 208227783                 | PLXNA2   | 14/32  | C                | G                  | NOVEL            | 42     | 0                | 947              | Q                   | E                    | Missense           | Possibly damaging | Disease-causing mutation              | -                                          | Tolerated                        | Yes                        |                                |
| 5           | chr2       | 170033060                 | LRRP2    | 54/79  | C                | T                  | DBSNP            | 10     | 0                | 3478             | H                   | Y                    | Missense           | Probably damaging | Disease-causing mutation              | -                                          | -                                | -                          |                                |
| 5           | chr2       | 17947498                  | ITIH3    | 27/28  | C                | A                  | NOVEL            | 9      | 0                | 17307            | S                   | R                    | Missense           | Benign            | Disease-causing mutation              | -                                          | -                                | -                          |                                |
| 5           | chr3       | 47161887-4718181          | SETD2    | 32/31  | ACTCT            | A                  | NOVEL            | 52     | 0                | 1412-1413        | ES                  | X                    | Frameshift         | Benign            | Disease-causing mutation              | -                                          | -                                | -                          |                                |
| 5           | chr3       | 52089955                  | DUSP7    | 1/3    | A                | G                  | NOVEL            | 43     | 0                | 160              | K                   | E                    | Missense           | Probably damaging | Disease-causing mutation              | -                                          | Deleterious                      | Yes                        |                                |
| 5           | chr3       | 6985209                   | ITIH5    | 9/10   | A                | A                  | NOVEL            | 4      | 0                | 236              | D                   | N                    | NOVEL              | Probably damaging | Disease-causing mutation              | -                                          | Deleterious                      | Yes                        |                                |
| 5           | chr3       | 110863745                 | PVRL3    | 1/1    | G                | A                  | NOVEL            | 41     | 0                | -                | -                   | -                    | Splice site        | -                 | Disease-causing mutation              | -                                          | -                                | -                          |                                |
| 5           | chr3       | 11375194                  | KIAA2018 | 7/7    | C                | T                  | NOVEL            | 42     | 0                | 1779             | Q                   | *                    | Splice site        | -                 | Disease-causing mutation              | -                                          | -                                | -                          |                                |
| 5           | chr4       | 17841343                  | NCAIP6   | 17/21  | G                | C                  | NOVEL            | 14     | 0                | 837              | E                   | D                    | Missense           | Probably damaging | Disease-causing mutation              | -                                          | Deleterious                      | Yes                        |                                |
| 5           | chr4       | 57916666                  | RSL1D1   | 12/28  | C                | T                  | NOVEL            | 37     | 0                | 515              | B                   | I                    | Missense           | Probably damaging | Disease-causing mutation              | -                                          | -                                | -                          |                                |
| 5           | chr4       | 76733470                  | USO1     | 24/25  | C                | T                  | NOVEL            | 8      | 0                | 923              | A                   | A                    | Missense           | Probably damaging | Disease-causing mutation              | -                                          | -                                | -                          |                                |
| 5           | chr4       | 12395753                  | KANAI109 | 5/6    | C                | G                  | NOVEL            | 18     | 0                | 80               | S                   | C                    | Missense           | Probably damaging | Disease-causing mutation              | -                                          | -                                | -                          |                                |
| 5           | chr4       | 17142821                  | ITIH4    | 14/14  | G                | A                  | NOVEL            | 47     | 0                | 174              | E                   | K                    | Missense           | Probably damaging | Disease-causing mutation              | -                                          | Deleterious                      | Yes                        |                                |
| 5           | chr5       | 173383124                 | CPEB4    | 10/10  | C                | A                  | NOVEL            | 30     | 0                | 725              | S                   | *                    | Splice site        | -                 | Disease-causing mutation              | -                                          | -                                | -                          |                                |
| 5           | chr6       | 144081539                 | PHACTR2  | 5/13   | G                | A                  | NOVEL            | 38     | 0                | 152              | Y                   | K                    | Missense           | Probably damaging | Disease-causing mutation              | -                                          | -                                | -                          |                                |
| 5           | chr7       | 11500388                  | ITIH3    | 11/28  | C                | T                  | COSMIC           | 33     | 0                | 636              | K                   | N                    | Missense           | Probably damaging | Disease-causing mutation              | -                                          | Deleterious                      | Yes                        |                                |
| 5           | chr7       | 138204006                 | TRIM24   | 4/19   | G                | A                  | NOVEL            | 55     | 0                | 235              | C                   | Y                    | Missense           | Probably damaging | Disease-causing mutation              | -                                          | Deleterious                      | Yes                        |                                |
| 5           | chr7       | 138235907                 | TRIM24   | 8/19   | C                | T                  | NOVEL            | 33     | 0                | 415              | Q                   | *                    | Splice site        | -                 | Disease-causing mutation              | -                                          | -                                | -                          |                                |
| 5           | chr7       | 138749702                 | ZC3H4P   | 8/13   | A                | C                  | COSMIC           | 67     | 0                | 639              | E                   | V                    | Missense           | Benign            | Disease-causing mutation              | -                                          | Deleterious                      | Yes                        |                                |
| 5           | chr7       | 17466361                  | RNF45    | 5/10   | G                | C                  | NOVEL            | 60     | 0                | 180              | M                   | I                    | Missense           | Probably damaging | Disease-causing mutation              | -                                          | Tolerated                        | Yes                        |                                |
| 5           | chr9       | 79636550                  | FOXBE1   | 1/1    | C                | T                  | COSMIC           | 11     | 0                | 427              | S                   | L                    | Missense           | Probably damaging | Disease-causing mutation              | -                                          | -                                | -                          |                                |
| 5           | chr9       | 126370689                 | GR12L1   | 1/2    | C                | G                  | NOVEL            | 11     | 0                | 18               | S                   | C                    | Missense           | Probably damaging | Disease-causing mutation              | -                                          | Deleterious                      | Yes                        |                                |
| 5           | chr9       | 130893132                 | PTGES2   | 5/7    | C                | T                  | NOVEL            | 18     | 0                | 243              | G                   | T                    | Missense           | Probably damaging | Disease-causing mutation              | -                                          | Deleterious                      | Yes                        |                                |
| 5           | chr10      | 64952712                  | JMJD1C   | 16/26  | C                | G                  |                  |        |                  |                  |                     |                      |                    |                   |                                       |                                            |                                  |                            |                                |

|    |       |                     |         |       |          |          |               |       |    |         |       |      |  |                    |                    |                          |                          |     |           |  |
|----|-------|---------------------|---------|-------|----------|----------|---------------|-------|----|---------|-------|------|--|--------------------|--------------------|--------------------------|--------------------------|-----|-----------|--|
| 43 | chr1  | 153233991           | LOR     | 2/2   | A        | ACTCTGG  | COSMIC        | 32    | 0  | 189     |       |      |  | Splice site        |                    | Disease-causing mutation |                          |     |           |  |
| 43 | chr2  | 230458417           | DNER    | 2/13  | C        | A        | COSMIC        | 41    | 0  | 155     | P     | L    |  | Missense           | Benign             | Disease-causing mutation | Deleterious              |     | Yes       |  |
| 43 | chr4  | 12620869            | FATA1   | 4/17  | C        | T        | DBSNP         | 38    | 0  | 1866    | T     | M    |  | Missense           | Probably damaging  | Disease-causing mutation |                          |     |           |  |
| 43 | chr5  | 141039044           | ARAP3   | -     | G        | A        | NOVEL         | 39    | 0  |         |       |      |  | Splice site        |                    | Disease-causing mutation |                          |     |           |  |
| 43 | chr5  | 178416593           | GRM8    | 6/10  | G        | T        | NOVEL         | 41    | 0  | 414     | A     | T    |  | Missense           | Probably damaging  | Disease-causing mutation | Deleterious              |     | Yes       |  |
| 43 | chr11 | 108100021           | ATM     | 4/63  | T        | A        | NOVEL         | 71    | 0  | 101     | V     | D    |  | Missense           | Probably damaging  | Disease-causing mutation |                          |     | Yes       |  |
| 43 | chr12 | 53860313            | ESPL1   | 18/31 | C        | G        | NOVEL         | 42    | 0  | 1265    | R     | G    |  | Missense           | Possibly damaging  | Disease-causing mutation | Deleterious              |     | Yes       |  |
| 43 | chr13 | 28002940            | FLT3    | 16/24 | C        | T        | COSMIC        | 26    | 0  | 678     | N     | K    |  | Missense           | Probably damaging  | Disease-causing mutation | Deleterious              |     | Yes       |  |
| 43 | chr14 | 93301915            | GOLGA5  | 11/13 | C        | T        | NOVEL         | 36    | 0  | 653     | R     | *    |  | Truncation         |                    | Disease-causing mutation |                          |     | Yes       |  |
| 43 | chr14 | 109604072           | EVL     | -     | G        | T        | DBSNP         | 34    | 0  |         |       |      |  | Splice site        |                    | Disease-causing mutation |                          |     |           |  |
| 43 | chr17 | 2377093             | TP53    | 8/11  | G        | C        | COSMIC        | 78    | 0  | 282     | R     | P    |  | Missense           | Probably damaging  | Disease-causing mutation | Deleterious              |     | Yes       |  |
| 43 | chr17 | 76082940            | TNRCC6  | 13/21 | C        | T        | NOVEL         | 41    | 0  | 1187    | R     | C    |  | Missense           | Probably damaging  | Disease-causing mutation | Deleterious              |     | Yes       |  |
| 43 | chr19 | 42860512            | MECFB   | 25/41 | G        | A        | DBSNP         | 44    | 0  | 1443    | R     | H    |  | Missense           | Probably damaging  | Disease-causing mutation | Deleterious              |     | Yes       |  |
| 43 | chr22 | 43865862            | EFCAB8  | 2/32  | G        | T        | COSMIC        | 41    | 0  | 1032    | E     | K    |  | Missense           | Possibly damaging  | Benign                   | Deleterious              |     | Yes       |  |
| 43 | chrX  | 47836179            | ZNF182  | 7/7   | G        | A        | NOVEL         | 8     | 0  | 436     | G     | V    |  | Missense           | Probably damaging  | Disease-causing mutation | Deleterious              |     |           |  |
| 44 | chr1  | 63877638            | ALG6    | 9/15  | C        | T        | NOVEL         | 10    | 0  | 241     | S     | F    |  | Missense           | Possibly damaging  | Disease-causing mutation | Deleterious              |     |           |  |
| 44 | chr1  | 115268748           | NRAS    | 2/7   | G        | T        | COSMIC        | 39    | 0  | 12      | G     | S    |  | Missense           | Benign             | Disease-causing mutation | Deleterious              | Yes |           |  |
| 44 | chr2  | 84934070            | DNAH6   | 5/477 | C        | T        | NOVEL         | 13    | 0  | 2960    | R     | C    |  | Missense           | Probably damaging  | Disease-causing mutation | Deleterious              |     |           |  |
| 44 | chr3  | 122545724           | DIRC2   | 3/9   | C        | T        | DBSNP         | 49    | 0  | 172     | T     | M    |  | Missense           | Benign             | Disease-causing mutation | Deleterious              |     | Yes       |  |
| 44 | chr3  | 125850318           | ALDH1L1 | 13/23 | C        | A        | COSMIC        | 50    | 0  | 521     | A     | V    |  | Missense           | Possibly damaging  | Disease-causing mutation | Deleterious              |     | Yes       |  |
| 44 | chr6  | 147560451-147560468 | POLR4F2 | 1/2   | T        | TGGCGG   | TGGCGGG       | NOVEL | 41 | 0       | 55-58 |      |  |                    | Splice site, indel |                          | Disease-causing mutation |     |           |  |
| 44 | chr6  | 140789385           | PCDHGB4 | 1/4   | G        | A        | NOVEL         | 39    | 0  | 645     | R     | H    |  | Missense           | Benign             | Disease-causing mutation | Deleterious              |     |           |  |
| 44 | chr6  | 16327915-16327918   | ATXN1   | 8/9   | ATGC     | ATGCTGC  | NOVEL         | 100   | 0  | 208-209 | QH    | QOOH |  | Inframe indel      |                    | Disease-causing mutation |                          |     |           |  |
| 44 | chr9  | 13355611-13355669   | HRCT1   | 1/1   | CTCTCTCT | CTCTCTCT | NOVEL         | 100   | 0  | 100-101 |       |      |  | Splice site, indel |                    | Disease-causing mutation |                          |     |           |  |
| 44 | chr12 | 11214801            | TAS2R46 | 1/1   | T        | G        | NOVEL         | 8     | 0  | 98      | L     | P    |  | Missense           | Possibly damaging  | Disease-causing mutation | Deleterious              |     |           |  |
| 44 | chr14 | 92537363            | ATXN3   | 10/11 | C        | CG       | NOVEL         | 45    | 0  | 315     | G     | AK   |  | Frameshift         |                    | Disease-causing mutation |                          |     |           |  |
| 44 | chr15 | 83074827            | DETI    | 3/8   | C        | T        | NOVEL         | 8     | 0  | 181     | D     | E    |  | Missense           | Possibly damaging  | Disease-causing mutation |                          |     | Tolerated |  |
| 44 | chr19 | 33450585            | RHPN2   | 10/15 | C        | A        | DBSNP, COSMIC | 17    | 0  | 378     | G     | *    |  | Truncation         |                    | Disease-causing mutation |                          |     |           |  |

Supplementary Table 4: A list of mutations in eight IAMP21 patient samples. WES was performed on the matched diagnostic and remission material of eight IAMP21 patient samples (patients 1, 3, 5, 7, 9, 21, 43 and 44). Somatic mutations that were predicted to alter protein function by the majority of protein-damaging prediction tools (PolyPhen2, SIFT and Mutation Taster) are listed. DBSNP variants with <1% minor allelic frequency (MAF) were included. Mutations in components of the RAS pathway are highlighted in grey.

**Supplementary Table 5: RAS pathway mutations in iAMP21-ALL.** 44 mutations were identified in 26 (25 diagnostic and 1 relapse) iAMP21-ALL patient samples (column A); relapse samples are depicted by 'b', as shown in Supplementary Table 1. Details of the mutation (columns B-D, F), genomic location of the variation (column E) and the predicted functional consequence of the mutation, as predicted by Mutation Taster and Polyphen2 (columns G-I), are shown. Mutations previously identified in cancer are highlighted (column J); yes\* defines *FLT3*-ITD mutations that have been previously reported but the number of inserted amino acids is different.

| Patient # | Gene          | Mutation<br>- amino acid change | Variant allele frequency (%) | Genome position | Nucleotide change | Type of mutation | Polyphen2<br>Protein-damaging | MutationTaster<br>Protein-damaging | Reported in COSMIC |
|-----------|---------------|---------------------------------|------------------------------|-----------------|-------------------|------------------|-------------------------------|------------------------------------|--------------------|
| 1         | <i>NRAS</i>   | Q22K                            | 5%                           | chr1:115258718  | C/A               | Missense         | Probably damaging             | Disease-causing mutation           | Yes                |
| 1         | <i>NF1</i>    | P1667S                          | 39%                          | chr17:29653001  | C/T               | Missense         | Probably damaging             | Disease-causing mutation           | No                 |
| 3         | <i>KRAS</i>   | L19F                            | 2%                           | chr12:25398262  | G/C               | Missense         | Probably damaging             | Disease-causing mutation           | Yes                |
| 3         | <i>NRAS</i>   | E49K                            | 3%                           | chr1:115256566  | C/T               | Missense         | Benign                        | Disease-causing mutation           | Yes                |
| 3         | <i>NRAS</i>   | R68T                            | 3%                           | chr1:115256508  | C/G               | Missense         | Probably damaging             | Disease-causing mutation           | Yes                |
| 3         | <i>PTPN11</i> | E76Q                            | 4%                           | chr12:112888210 | G/C               | Missense         | Probably damaging             | Disease-causing mutation           | Yes                |
| 4         | <i>NRAS</i>   | G13D                            | 29%                          | chr1:115258744  | C/T               | Missense         | Benign                        | Disease-causing mutation           | Yes                |
| 5         | <i>PTPN11</i> | N58S                            | 48%                          | chr12:112888157 | A/G               | Missense         | Possibly damaging             | Disease-causing mutation           | Yes                |
| 5         | <i>PTPN11</i> | A72T                            | 44%                          | chr12:112888198 | G/A               | Missense         | Probably damaging             | Disease-causing mutation           | Yes                |
| 6         | <i>FLT3</i>   | L610>WAREYEDLKWEFPREN           | 13%                          | chr13:28608251  | 51bp insertion    | Indel            | NA                            | NA                                 | Yes                |
| 7         | <i>FLT3</i>   | P606>IWEYDLKWEF                 | 4%                           | chr13:28608239  | 30bp insertion    | Indel            | NA                            | NA                                 | Yes                |
| 8         | <i>NRAS</i>   | R68fs                           | 6%                           | chr1:115256506  | GAGA/TTCC         | Indel            | NA                            | Disease-causing mutation           | No                 |
| 8         | <i>FLT3</i>   | D835V                           | 3%                           | chr13:28592641  | T/A               | Missense         | Probably damaging             | Disease-causing mutation           | Yes                |
| 9         | <i>NRAS</i>   | G12S                            | 8%                           | chr1:115258748  | C/T               | Missense         | Possibly damaging             | Disease-causing mutation           | Yes                |
| 9         | <i>NRAS</i>   | G12C                            | 2%                           | chr1:115258748  | C/A               | Missense         | Possibly damaging             | Disease-causing mutation           | Yes                |
| 9         | <i>NRAS</i>   | G12D                            | 2%                           | chr1:115258747  | C/T               | Missense         | Benign                        | Disease-causing mutation           | Yes                |
| 9         | <i>NRAS</i>   | G13D                            | 5%                           | chr1:115258744  | C/T               | Missense         | Benign                        | Disease-causing mutation           | Yes                |
| 10        | <i>KRAS</i>   | G12D                            | 37%                          | chr12:25398284  | C/T               | Missense         | Possibly damaging             | Disease-causing mutation           | Yes                |
| 10        | <i>KRAS</i>   | G12D                            | 5%                           | chr12:25398284  | C/T               | Missense         | Possibly damaging             | Disease-causing mutation           | Yes                |
| 11        | <i>FLT3</i>   | F605>SRRYEDLKWEF                | 9%                           | chr13:28608242  | 33bp insertion    | Indel            | NA                            | NA                                 | Yes*               |
| 12        | <i>FLT3</i>   | F590fs                          | 9%                           | chr13:28608287  | 10bp insertion    | Frameshift       | NA                            | Disease-causing mutation           | Yes*               |
| 12b       | <i>NRAS</i>   | G12D                            | 48%                          | chr1:115258747  | C/T               | Missense         | Benign                        | Disease-causing mutation           | Yes                |
| 12b       | <i>PTPN11</i> | R351Q                           | 48%                          | chr12:112915779 | G/A               | Missense         | Benign                        | Disease-causing mutation           | No                 |
| 14        | <i>NRAS</i>   | Q61H                            | 31%                          | chr1:115256528  | T/A               | Missense         | Benign                        | Disease-causing mutation           | Yes                |
| 17        | <i>PTPN11</i> | E76K                            | 35%                          | chr12:112888210 | G/A               | Missense         | Probably damaging             | Disease-causing mutation           | Yes                |
| 18        | <i>NRAS</i>   | Y64_S65insGQEE                  | 42%                          | chr1:115256521  | 12bp insertion    | Indel            | NA                            | Disease-causing mutation           | No                 |
| 19        | <i>NRAS</i>   | G12S                            | 21%                          | chr1:115258748  | C/T               | Missense         | Benign                        | Disease-causing mutation           | Yes                |
| 19        | <i>NRAS</i>   | G12V                            | 24%                          | chr1:115258747  | C/A               | Missense         | Possibly damaging             | Disease-causing mutation           | Yes                |
| 20        | <i>NRAS</i>   | G13V                            | 5%                           | chr1:115258744  | C/A               | Missense         | Probably damaging             | Disease-causing mutation           | Yes                |
| 20        | <i>NRAS</i>   | Y64N                            | 3%                           | chr1:115256521  | A/T               | Missense         | Probably damaging             | Disease-causing mutation           | Yes                |
| 21        | <i>KRAS</i>   | G12V                            | 11%                          | chr12:25398284  | C/A               | Missense         | Probably damaging             | Disease-causing mutation           | Yes                |
| 21        | <i>FLT3</i>   | K602>LADEFYVDFREYEDL            | 13%                          | chr13:28608252  | 51bp insertion    | Indel            | NA                            | NA                                 | Yes                |
| 22        | <i>KRAS</i>   | G12R                            | 26%                          | chr12:25398285  | C/G               | Missense         | Possibly damaging             | Disease-causing mutation           | Yes                |
| 22        | <i>KRAS</i>   | G12V                            | 10%                          | chr12:25398284  | C/A               | Missense         | Possibly damaging             | Disease-causing mutation           | Yes                |
| 24        | <i>FLT3</i>   | I836del                         | 6%                           | chr13:28592637  | 3bp deletion      | Indel            | NA                            | Disease-causing mutation           | Yes                |
| 26        | <i>FLT3</i>   | F612>LDFREYEDLKWEFPRENLEF       | 16%                          | chr13:28608220  | 60bp insertion    | Indel            | NA                            | NA                                 | Yes*               |
| 29        | <i>NRAS</i>   | G12S                            | 48%                          | chr1:115258748  | C/T               | Missense         | Benign                        | Disease-causing mutation           | Yes                |
| 30        | <i>NRAS</i>   | G13D                            | 12%                          | chr1:115258744  | C/T               | Missense         | Benign                        | Disease-causing mutation           | Yes                |
| 30        | <i>NRAS</i>   | G13V                            | 6%                           | chr1:115258744  | C/A               | Missense         | Probably damaging             | Disease-causing mutation           | Yes                |
| 31        | <i>KRAS</i>   | G13D                            | 52%                          | chr12:25398281  | C/T               | Missense         | Possibly damaging             | Disease-causing mutation           | Yes                |
| 31        | <i>KRAS</i>   | F78L                            | 2%                           | chr12:25380226  | A/G               | Missense         | Possibly damaging             | Disease-causing mutation           | No                 |
| 37        | <i>FLT3</i>   | N609>RVLSGHVDFREYEDLKWEFPREN    | 9%                           | chr13:28608230  | 69bp insertion    | Indel            | NA                            | NA                                 | Yes*               |
| 39        | <i>NRAS</i>   | Q61L                            | 2%                           | chr1:115256529  | T/A               | Missense         | Probably damaging             | Disease-causing mutation           | Yes                |
| 39        | <i>BRAF</i>   | V600E                           | 44%                          | chr7:140453136  | A/T               | Missense         | Probably damaging             | Disease-causing mutation           | Yes                |

| Patient sample    | Diagnostic lesion                                                                                                               | Relapse lesion                                                                                                                                                                           |
|-------------------|---------------------------------------------------------------------------------------------------------------------------------|------------------------------------------------------------------------------------------------------------------------------------------------------------------------------------------|
| 6 <sup>BD</sup>   | <i>RB1</i> deletion (CN=1)<br><i>IKZF1</i> deletion (CN=1)<br><i>FLT3</i> ITD (L610>E611ins18) (VAF, 13%)                       | <i>IKZF1</i> deletion (CN=1)<br><i>CRLF2</i> rearrangement                                                                                                                               |
| 12 <sup>ABC</sup> | <i>IKZF1</i> deletion (CN=1)<br><i>CRLF2</i> gain (CN=3)<br><i>FLT3</i> F590_D593fs (VAF, 9%)<br>Ch11:96439395-134944770 (CN=1) | <i>IKZF1</i> deletion (CN=1)<br><i>EBF1</i> gain (CN=3)<br><i>CRLF2</i> rearrangement<br><i>NRAS</i> G12D (VAF, 48%)<br><i>PTPN11</i> R351Q (VAF, 48%)<br>Ch11:96439395-134944770 (CN=1) |
| 24 <sup>AD</sup>  | <i>FLT3</i> I836>M<br>Ch7:120150796-159119708 (CN=1)                                                                            | Ch7:120150796-159119708 (CN=1)                                                                                                                                                           |
| 33 <sup>BC</sup>  | <i>RB1</i> deletion (CN=1)                                                                                                      |                                                                                                                                                                                          |
| 34 <sup>BC</sup>  |                                                                                                                                 | <i>ETV6</i> deletion (CN=1)                                                                                                                                                              |
| 35 <sup>BC</sup>  | <i>ETV6</i> deletion (CN=1)                                                                                                     | <i>IKZF1</i> deletion (CN=1)                                                                                                                                                             |
| 36 <sup>BD</sup>  | <i>RB1</i> deletion (CN=0)<br><i>CRLF2</i> gain (CN=3)                                                                          | <i>RB1</i> deletion (CN=0)                                                                                                                                                               |

**Supplementary Table 6: Summary of genomic abnormalities in 7 matched diagnostic and relapse iAMP21-ALL samples.** Seven diagnostic and relapse matched pairs were interrogated by SNP6.0 array (<sup>A</sup>) (to identify copy number abnormalities (CNA) of RAS pathway gene loci), MLPA (<sup>B</sup>) (to identify CNAs of recurrently deleted ALL genes), and targeted sequencing approaches (Screen A (<sup>C</sup>) and Screen B (<sup>D</sup>)) (Supplementary Figure 1). All cases were confirmed as iAMP21-ALL at diagnosis and relapse (Supplementary Table 1). The genomic aberrations that were similar at diagnosis and relapse are highlighted in red text. Mutations and CNA identified by MLPA were not detected in the diagnostic sample of patient 34 or the relapse material of patient 33. A single CNA or somatic mutation was not consistent or specific to diagnostic and/or relapse iAMP21-ALL. The genomic profile was frequently different between the 7 matched diagnostic and relapse samples. Abbreviations: VAF, variant allele frequency; CN, gene copy number.
